# Supplementary material
Source: publisher site journal article supplement (https://www.spandidos-publications.com/3785/downloadSupplementary)
Supplement: Supplementary file 1 [file downloadSupplementary]

## Sheet: Table S2
Table SII. List of all differentially expressed genes (DEGs) between pCa organoids and their tissue.
Ensemble ID	Gene symbol	Fold-change (log base 2)	p-adjusted
ENSG00000130176	CNN1	-12.7953	1.72e-44
ENSG00000107796	ACTA2	-8.91318	8.51e-41
ENSG00000172403	SYNPO2	-10.165	1.05e-38
ENSG00000101335	MYL9	-10.9152	5.6e-35
ENSG00000175084	DES	-13.127	8.82e-34
ENSG00000128591	FLNC	-9.45507	1.15e-32
ENSG00000182253	SYNM	-8.74049	3.78e-32
ENSG00000065534	MYLK	-8.40191	5.68e-32
ENSG00000011465	DCN	-10.5803	4.55e-31
ENSG00000163431	LMOD1	-10.5397	6.52e-31
ENSG00000185479	KRT6B	11.9174	2.68e-30
ENSG00000137440	FGFBP1	9.20772	1.51e-29
ENSG00000134757	DSG3	9.35413	8.7e-28
ENSG00000112936	C7	-11.3865	1.13e-27
ENSG00000154330	PGM5	-11.0536	6.12e-27
ENSG00000106624	AEBP1	-8.07503	1.3e-26
ENSG00000269936	RP11-394O4.5	-11.0086	1.1e-25
ENSG00000106772	PRUNE2	-10.326	1.42e-24
ENSG00000149591	TAGLN	-10.6079	2.72e-24
ENSG00000022267	FHL1	-8.42563	3.76e-24
ENSG00000174099	MSRB3	-10.0078	2.07e-23
ENSG00000188783	PRELP	-9.97655	2.74e-23
ENSG00000189058	APOD	-6.84164	4.15e-23
ENSG00000198732	SMOC1	-8.96105	4.53e-22
ENSG00000167754	KLK5	7.35505	5.92e-22
ENSG00000196754	S100A2	7.02131	1.49e-21
ENSG00000154553	PDLIM3	-8.61557	2.12e-21
ENSG00000183036	PCP4	-14.0325	2.12e-21
ENSG00000123243	ITIH5	-7.93408	2.33e-21
ENSG00000072163	LIMS2	-10.8093	2.72e-21
ENSG00000143546	S100A8	6.5256	4.8e-21
ENSG00000205420	KRT6A	10.3171	6.47e-21
ENSG00000111341	MGP	-9.42135	9.42e-21
ENSG00000196104	SPOCK3	-7.55665	4.29e-20
ENSG00000116774	OLFML3	-9.15897	6.13e-20
ENSG00000107317	PTGDS	-10.2681	1.18e-19
ENSG00000072952	MRVI1	-7.48373	1.28e-19
ENSG00000105894	PTN	-10.5646	1.37e-19
ENSG00000057149	SERPINB3	9.10552	1.38e-19
ENSG00000167751	KLK2	-11.1034	3.16e-19
ENSG00000109099	PMP22	-7.98403	8.44e-19
ENSG00000122367	LDB3	-9.52712	1.1e-18
ENSG00000182326	C1S	-7.06843	4.35e-18
ENSG00000162614	NEXN	-8.30194	4.4e-18
ENSG00000169035	KLK7	8.65307	6.06e-18
ENSG00000106034	CPED1	-9.90798	6.09e-18
ENSG00000059804	SLC2A3	-8.4901	6.44e-18
ENSG00000187955	COL14A1	-7.53301	6.44e-18
ENSG00000149451	ADAM33	-9.07697	8.67e-18
ENSG00000196091	MYBPC1	-9.81562	8.67e-18
ENSG00000106809	OGN	-11.4872	1.4e-17
ENSG00000144668	ITGA9	-7.61884	1.84e-17
ENSG00000241644	INMT	-9.8198	3.18e-17
ENSG00000145824	CXCL14	6.12873	3.31e-17
ENSG00000168309	FAM107A	-10.563	3.55e-17
ENSG00000240583	AQP1	-7.84162	5.32e-17
ENSG00000136167	LCP1	-9.90525	6.07e-17
ENSG00000103241	FOXF1	-6.97284	1.2e-16
ENSG00000136960	ENPP2	-7.92883	1.24e-16
ENSG00000101938	CHRDL1	-13.9045	1.44e-16
ENSG00000150051	MKX	-8.40687	1.5e-16
ENSG00000129538	RNASE1	-9.70485	2.82e-16
ENSG00000103710	RASL12	-9.47895	3.22e-16
ENSG00000165633	VSTM4	-7.5826	3.36e-16
ENSG00000138650	PCDH10	-7.58578	4.52e-16
ENSG00000170153	RNF150	-7.26965	4.66e-16
ENSG00000145936	KCNMB1	-14.3707	5.33e-16
ENSG00000174564	IL20RB	5.62698	5.61e-16
ENSG00000149294	NCAM1	-8.02461	6.04e-16
ENSG00000169594	BNC1	6.22521	1.03e-15
ENSG00000183023	SLC8A1	-8.36961	1.03e-15
ENSG00000198729	PPP1R14C	5.61197	1.15e-15
ENSG00000079931	MOXD1	-7.99553	1.55e-15
ENSG00000119508	NR4A3	-8.6169	1.67e-15
ENSG00000137975	CLCA2	7.12247	1.67e-15
ENSG00000172935	MRGPRF	-9.29622	2.65e-15
ENSG00000170801	HTRA3	-8.55791	3.09e-15
ENSG00000010438	PRSS3	9.27419	3.82e-15
ENSG00000175899	A2M	-6.38529	5.48e-15
ENSG00000107562	CXCL12	-10.5488	5.67e-15
ENSG00000139329	LUM	-8.2741	6.63e-15
ENSG00000103175	WFDC1	-14.3167	8.62e-15
ENSG00000170465	KRT6C	10.9374	1.04e-14
ENSG00000178934	LGALS7B	8.02413	1.04e-14
ENSG00000197641	SERPINB13	9.20938	1.04e-14
ENSG00000004776	HSPB6	-8.54962	1.63e-14
ENSG00000132329	RAMP1	-6.80816	1.65e-14
ENSG00000151715	TMEM45B	6.13759	2.04e-14
ENSG00000113140	SPARC	-5.87364	2.06e-14
ENSG00000161638	ITGA5	-5.70608	2.06e-14
ENSG00000161281	COX7A1	-9.25027	3.36e-14
ENSG00000197043	ANXA6	-6.30625	3.58e-14
ENSG00000268388	FENDRR	-10.6974	4.23e-14
ENSG00000147689	FAM83A	7.4974	4.41e-14
ENSG00000007908	SELE	-9.36493	5.73e-14
ENSG00000106538	RARRES2	-8.8354	6.25e-14
ENSG00000167641	PPP1R14A	-11.006	6.25e-14
ENSG00000163638	ADAMTS9	-6.54724	6.39e-14
ENSG00000167281	RBFOX3	-8.12874	6.39e-14
ENSG00000018625	ATP1A2	-13.148	6.51e-14
ENSG00000099998	GGT5	-7.4642	6.83e-14
ENSG00000226145	KRT16P6	6.36677	6.87e-14
ENSG00000253304	TMEM200B	-7.79069	7.46e-14
ENSG00000170006	TMEM154	5.53564	7.95e-14
ENSG00000121742	GJB6	9.56905	9.59e-14
ENSG00000064205	WISP2	-8.77438	9.62e-14
ENSG00000277893	SRD5A2	-13.0127	1.11e-13
ENSG00000213949	ITGA1	-6.91019	1.13e-13
ENSG00000174640	SLCO2A1	-6.84521	1.56e-13
ENSG00000163220	S100A9	5.8859	1.83e-13
ENSG00000141052	MYOCD	-10.0332	1.91e-13
ENSG00000249669	MIR143HG	-12.9063	2.01e-13
ENSG00000142515	KLK3	-10.6585	2.26e-13
ENSG00000149131	SERPING1	-5.29991	2.31e-13
ENSG00000127241	MASP1	-10.2322	2.57e-13
ENSG00000121769	FABP3	-6.62172	2.92e-13
ENSG00000142156	COL6A1	-4.99215	2.92e-13
ENSG00000159251	ACTC1	-12.6396	2.92e-13
ENSG00000198523	PLN	-13.994	3.63e-13
ENSG00000135333	EPHA7	-9.19171	5.03e-13
ENSG00000164692	COL1A2	-7.02461	5.06e-13
ENSG00000136155	SCEL	9.0615	5.27e-13
ENSG00000159403	C1R	-5.73067	5.56e-13
ENSG00000143320	CRABP2	5.20627	5.71e-13
ENSG00000122862	SRGN	-7.43387	6.48e-13
ENSG00000087245	MMP2	-6.24721	6.49e-13
ENSG00000131459	GFPT2	-7.40251	6.86e-13
ENSG00000148516	ZEB1	-5.62128	7.62e-13
ENSG00000240771	ARHGEF25	-5.40011	7.89e-13
ENSG00000258498	DIO3OS	-8.11	7.96e-13
ENSG00000068976	PYGM	-6.94059	8.46e-13
ENSG00000092051	JPH4	-7.68879	8.56e-13
ENSG00000169031	COL4A3	-8.06261	9.82e-13
ENSG00000133110	POSTN	-9.83962	1e-12
ENSG00000136546	SCN7A	-9.8185	1.01e-12
ENSG00000204131	NHSL2	-7.08905	1.05e-12
ENSG00000181856	SLC2A4	-7.63008	1.08e-12
ENSG00000144452	ABCA12	7.3106	1.27e-12
ENSG00000127329	PTPRB	-5.913	1.3e-12
ENSG00000077943	ITGA8	-9.69287	1.32e-12
ENSG00000136732	GYPC	-10.4062	1.32e-12
ENSG00000101951	PAGE4	-12.957	1.33e-12
ENSG00000090104	RGS1	-12.8957	1.34e-12
ENSG00000188257	PLA2G2A	-8.49002	1.34e-12
ENSG00000128266	GNAZ	-7.25243	1.45e-12
ENSG00000130988	RGN	-7.50962	1.51e-12
ENSG00000135069	PSAT1	5.3404	1.62e-12
ENSG00000189184	PCDH18	-5.61247	1.87e-12
ENSG00000104313	EYA1	-10.2113	1.97e-12
ENSG00000112562	SMOC2	-11.7469	1.97e-12
ENSG00000138080	EMILIN1	-6.11821	1.97e-12
ENSG00000010327	STAB1	-8.19321	1.98e-12
ENSG00000119147	C2orf40	-13.4068	2.16e-12
ENSG00000162511	LAPTM5	-8.92018	2.33e-12
ENSG00000186847	KRT14	6.04773	2.68e-12
ENSG00000197380	DACT3	-6.86404	2.75e-12
ENSG00000077264	PAK3	-7.43053	2.86e-12
ENSG00000048052	HDAC9	-6.24051	2.98e-12
ENSG00000163751	CPA3	-9.90575	3.16e-12
ENSG00000188373	C10orf99	9.07357	3.27e-12
ENSG00000165966	PDZRN4	-12.3491	3.28e-12
ENSG00000101255	TRIB3	5.87882	3.31e-12
ENSG00000106823	ECM2	-6.02456	3.31e-12
ENSG00000124212	PTGIS	-11.4731	4e-12
ENSG00000169282	KCNAB1	-6.62419	4.3e-12
ENSG00000120820	GLT8D2	-7.29902	4.31e-12
ENSG00000180139	ACTA2-AS1	-12.2921	4.85e-12
ENSG00000163453	IGFBP7	-5.14414	5.09e-12
ENSG00000173175	ADCY5	-7.10761	5.09e-12
ENSG00000122176	FMOD	-5.23685	5.15e-12
ENSG00000224958	PGM5-AS1	-12.2831	5.15e-12
ENSG00000187068	C3orf70	-8.74003	5.64e-12
ENSG00000162878	PKDCC	-8.25757	5.84e-12
ENSG00000149596	JPH2	-11.5101	6.23e-12
ENSG00000121577	POPDC2	-5.82333	6.37e-12
ENSG00000129467	ADCY4	-6.28144	6.7e-12
ENSG00000197253	TPSB2	-10.6379	7.18e-12
ENSG00000205076	LGALS7	7.57792	7.88e-12
ENSG00000185565	LSAMP	-6.9689	8.07e-12
ENSG00000198467	TPM2	-6.24576	8.28e-12
ENSG00000140682	TGFB1I1	-4.64619	9.16e-12
ENSG00000119865	CNRIP1	-8.87836	9.84e-12
ENSG00000025423	HSD17B6	-7.55709	1.03e-11
ENSG00000128052	KDR	-5.451	1.03e-11
ENSG00000121898	CPXM2	-12.1504	1.1e-11
ENSG00000068831	RASGRP2	-9.20257	1.12e-11
ENSG00000121361	KCNJ8	-8.51082	1.13e-11
ENSG00000134201	GSTM5	-12.3392	1.5e-11
ENSG00000146966	DENND2A	-6.7693	1.59e-11
ENSG00000173918	C1QTNF1	-6.34763	1.61e-11
ENSG00000173641	HSPB7	-12.9642	1.67e-11
ENSG00000069535	MAOB	-5.02268	1.9e-11
ENSG00000241158	ADAMTS9-AS1	-11.9665	2.26e-11
ENSG00000164530	PI16	-10.5522	2.36e-11
ENSG00000140285	FGF7	-8.35105	2.41e-11
ENSG00000115361	ACADL	-7.13623	2.45e-11
ENSG00000153294	ADGRF4	8.56515	2.45e-11
ENSG00000139910	NOVA1	-5.98388	2.52e-11
ENSG00000172987	HPSE2	-12.1307	2.79e-11
ENSG00000154721	JAM2	-7.46934	2.81e-11
ENSG00000153823	PID1	-6.63023	2.82e-11
ENSG00000182578	CSF1R	-8.57318	2.84e-11
ENSG00000130822	PNCK	-5.64212	3.27e-11
ENSG00000196557	CACNA1H	-8.8126	3.37e-11
ENSG00000198832	SELM	-6.49635	3.37e-11
ENSG00000090376	IRAK3	-5.4252	3.47e-11
ENSG00000139988	RDH12	6.9876	3.58e-11
ENSG00000213088	ACKR1	-11.8761	3.58e-11
ENSG00000081052	COL4A4	-9.01746	3.84e-11
ENSG00000164035	EMCN	-6.65139	4.18e-11
ENSG00000122694	GLIPR2	-6.5894	4.32e-11
ENSG00000128656	CHN1	-8.09449	4.39e-11
ENSG00000168675	LDLRAD4	-6.29201	4.61e-11
ENSG00000174348	PODN	-10.9673	5.19e-11
ENSG00000169469	SPRR1B	11.8414	5.43e-11
ENSG00000159189	C1QC	-12.713	5.75e-11
ENSG00000133107	TRPC4	-8.60626	5.87e-11
ENSG00000067715	SYT1	-7.00645	5.99e-11
ENSG00000172236	TPSAB1	-12.0594	6.61e-11
ENSG00000172260	NEGR1	-8.82987	6.62e-11
ENSG00000176533	GNG7	-5.71852	6.68e-11
ENSG00000017427	IGF1	-11.844	6.83e-11
ENSG00000229619	MBNL1-AS1	-7.18462	6.83e-11
ENSG00000049540	ELN	-5.17016	8.21e-11
ENSG00000157570	TSPAN18	-8.17279	8.38e-11
ENSG00000135472	FAIM2	-7.13616	9.06e-11
ENSG00000143196	DPT	-12.0989	9.24e-11
ENSG00000146374	RSPO3	-11.7615	9.33e-11
ENSG00000164106	SCRG1	-10.4552	9.63e-11
ENSG00000161835	GRASP	-6.72078	1.12e-10
ENSG00000167749	KLK4	-9.47328	1.12e-10
ENSG00000197361	FBXL22	-6.32777	1.17e-10
ENSG00000113657	DPYSL3	-5.70618	1.2e-10
ENSG00000169174	PCSK9	7.0871	1.21e-10
ENSG00000151067	CACNA1C	-6.52367	1.26e-10
ENSG00000048540	LMO3	-11.4732	1.32e-10
ENSG00000164764	SBSPON	-8.70704	1.32e-10
ENSG00000127951	FGL2	-10.7595	1.36e-10
ENSG00000010295	IFFO1	-6.10696	1.46e-10
ENSG00000160307	S100B	-11.5895	1.53e-10
ENSG00000121552	CSTA	4.3172	1.54e-10
ENSG00000205413	SAMD9	4.32661	1.56e-10
ENSG00000211677	IGLC2	-8.96657	1.59e-10
ENSG00000183801	OLFML1	-7.25933	1.6e-10
ENSG00000280143	AP000892.6	-8.15252	1.6e-10
ENSG00000162543	UBXN10	-8.53628	1.76e-10
ENSG00000106066	CPVL	-11.768	1.82e-10
ENSG00000046889	PREX2	-7.38475	1.84e-10
ENSG00000170962	PDGFD	-4.75826	1.84e-10
ENSG00000108823	SGCA	-12.3219	1.85e-10
ENSG00000174403	C20orf166-AS1	-11.4451	1.92e-10
ENSG00000162692	VCAM1	-7.39792	1.94e-10
ENSG00000189129	PLAC9	-9.68989	1.95e-10
ENSG00000073712	FERMT2	-5.22842	1.96e-10
ENSG00000115935	WIPF1	-4.76178	1.96e-10
ENSG00000131477	RAMP2	-9.05673	1.96e-10
ENSG00000019582	CD74	-4.17933	2.21e-10
ENSG00000116194	ANGPTL1	-8.15086	2.3e-10
ENSG00000124440	HIF3A	-8.9948	2.34e-10
ENSG00000133710	SPINK5	6.55542	2.36e-10
ENSG00000078295	ADCY2	-5.56254	2.41e-10
ENSG00000123560	PLP1	-10.6548	2.44e-10
ENSG00000153902	LGI4	-5.23139	2.55e-10
ENSG00000112320	SOBP	-4.92749	2.66e-10
ENSG00000182963	GJC1	-5.71476	2.73e-10
ENSG00000115896	PLCL1	-8.07865	2.77e-10
ENSG00000151892	GFRA1	-11.3035	2.91e-10
ENSG00000144681	STAC	-11.8724	3.1e-10
ENSG00000130224	LRCH2	-7.93014	3.21e-10
ENSG00000215218	UBE2QL1	-5.43926	3.24e-10
ENSG00000131831	RAI2	-5.54883	3.27e-10
ENSG00000161381	PLXDC1	-6.48539	3.29e-10
ENSG00000168952	STXBP6	-6.70769	3.4e-10
ENSG00000146122	DAAM2	-7.76356	3.45e-10
ENSG00000028137	TNFRSF1B	-7.83145	3.7e-10
ENSG00000008277	ADAM22	-5.17246	3.78e-10
ENSG00000164687	FABP5	5.20352	3.81e-10
ENSG00000136160	EDNRB	-7.3216	3.84e-10
ENSG00000100473	COCH	-7.09738	3.87e-10
ENSG00000112319	EYA4	-6.98178	3.97e-10
ENSG00000162998	FRZB	-6.70204	4.03e-10
ENSG00000075618	FSCN1	4.28867	4.17e-10
ENSG00000149633	KIAA1755	-7.45788	4.33e-10
ENSG00000211592	IGKC	-9.32479	4.39e-10
ENSG00000140092	FBLN5	-4.94154	4.46e-10
ENSG00000196569	LAMA2	-4.73111	4.46e-10
ENSG00000198074	AKR1B10	7.82374	4.9e-10
ENSG00000165474	GJB2	8.28369	4.97e-10
ENSG00000130600	H19	-8.63615	5.07e-10
ENSG00000163520	FBLN2	-4.8361	5.07e-10
ENSG00000108691	CCL2	-6.53328	5.09e-10
ENSG00000183287	CCBE1	-6.43317	5.11e-10
ENSG00000126950	TMEM35	-5.5604	5.31e-10
ENSG00000112769	LAMA4	-4.45672	5.59e-10
ENSG00000172346	CSDC2	-7.62672	6.26e-10
ENSG00000154864	PIEZO2	-6.19999	6.44e-10
ENSG00000196735	HLA-DQA1	-8.18695	6.45e-10
ENSG00000189001	SBSN	12.1932	6.76e-10
ENSG00000162512	SDC3	-4.94501	7.25e-10
ENSG00000011600	TYROBP	-12.2405	7.35e-10
ENSG00000260230	FRRS1L	-7.445	7.35e-10
ENSG00000106069	CHN2	-5.75546	7.46e-10
ENSG00000127472	PLA2G5	-12.0615	7.46e-10
ENSG00000211679	IGLC3	-11.1334	7.49e-10
ENSG00000132840	BHMT2	-7.12117	7.69e-10
ENSG00000129009	ISLR	-7.14162	7.74e-10
ENSG00000105137	SYDE1	-5.46914	8.04e-10
ENSG00000055118	KCNH2	-5.95886	8.06e-10
ENSG00000156113	KCNMA1	-4.7814	8.17e-10
ENSG00000169554	ZEB2	-6.83167	8.43e-10
ENSG00000068615	REEP1	-6.68381	8.6e-10
ENSG00000151012	SLC7A11	6.34021	8.99e-10
ENSG00000196159	FAT4	-5.45013	9.05e-10
ENSG00000169744	LDB2	-6.89702	9.51e-10
ENSG00000249307	LINC01088	-8.93832	9.55e-10
ENSG00000122786	CALD1	-4.03066	1.04e-09
ENSG00000167549	CORO6	-4.5483	1.05e-09
ENSG00000152931	PART1	-5.36711	1.12e-09
ENSG00000143318	CASQ1	-7.88886	1.13e-09
ENSG00000184113	CLDN5	-6.45513	1.17e-09
ENSG00000260802	LINC00890	-8.96302	1.19e-09
ENSG00000189334	S100A14	5.96596	1.22e-09
ENSG00000137124	ALDH1B1	-5.08979	1.41e-09
ENSG00000082175	PGR	-10.9972	1.43e-09
ENSG00000081189	MEF2C	-7.71991	1.45e-09
ENSG00000147655	RSPO2	-11.9487	1.49e-09
ENSG00000244734	HBB	-11.4916	1.51e-09
ENSG00000137491	SLCO2B1	-11.1347	1.54e-09
ENSG00000140416	TPM1	-4.75031	1.54e-09
ENSG00000152377	SPOCK1	-5.29614	1.54e-09
ENSG00000164122	ASB5	-12.0518	1.54e-09
ENSG00000123572	NRK	-7.99973	1.59e-09
ENSG00000137507	LRRC32	-7.08158	1.66e-09
ENSG00000123338	NCKAP1L	-8.45549	1.68e-09
ENSG00000144339	TMEFF2	-11.2961	1.69e-09
ENSG00000137819	PAQR5	5.32834	1.7e-09
ENSG00000130558	OLFM1	-6.32454	1.82e-09
ENSG00000143119	CD53	-11.267	1.84e-09
ENSG00000005108	THSD7A	-6.05362	1.93e-09
ENSG00000106565	TMEM176B	-10.9668	1.93e-09
ENSG00000177519	RPRM	-7.85736	1.93e-09
ENSG00000196542	SPTSSB	5.051	2.01e-09
ENSG00000127083	OMD	-10.8716	2.21e-09
ENSG00000132746	ALDH3B2	6.88197	2.32e-09
ENSG00000124882	EREG	6.92958	2.36e-09
ENSG00000107518	ATRNL1	-10.8616	2.4e-09
ENSG00000163884	KLF15	-7.70038	2.41e-09
ENSG00000123570	RAB9B	-6.0307	2.45e-09
ENSG00000163710	PCOLCE2	-6.72834	2.45e-09
ENSG00000218336	TENM3	-6.72996	2.49e-09
ENSG00000090382	LYZ	-10.8194	2.58e-09
ENSG00000205364	MT1M	-8.82919	2.85e-09
ENSG00000172572	PDE3A	-6.4836	2.92e-09
ENSG00000123892	RAB38	4.15693	3.02e-09
ENSG00000118777	ABCG2	-5.58583	3.03e-09
ENSG00000160593	AMICA1	-7.80142	3.13e-09
ENSG00000163145	C1QTNF7	-11.1481	3.13e-09
ENSG00000173406	DAB1	-10.7773	3.13e-09
ENSG00000145703	IQGAP2	-7.81174	3.25e-09
ENSG00000162630	B3GALT2	-11.0065	3.26e-09
ENSG00000198189	HSD17B11	-4.79879	3.26e-09
ENSG00000186469	GNG2	-6.64514	3.3e-09
ENSG00000131471	AOC3	-6.74698	3.52e-09
ENSG00000184785	SMIM10	-6.93633	3.73e-09
ENSG00000124479	NDP	-8.29318	3.85e-09
ENSG00000110077	MS4A6A	-10.9799	3.92e-09
ENSG00000180353	HCLS1	-6.71616	4.35e-09
ENSG00000196208	GREB1	-9.71626	4.35e-09
ENSG00000171533	MAP6	-5.47478	4.39e-09
ENSG00000158186	MRAS	-5.07581	4.44e-09
ENSG00000166831	RBPMS2	-9.97324	4.44e-09
ENSG00000183347	GBP6	7.34327	4.44e-09
ENSG00000145423	SFRP2	-5.9735	4.5e-09
ENSG00000139567	ACVRL1	-5.56236	4.61e-09
ENSG00000166482	MFAP4	-6.77345	5.03e-09
ENSG00000165410	CFL2	-5.24556	5.1e-09
ENSG00000124126	PREX1	-7.05162	5.11e-09
ENSG00000198626	RYR2	-10.6615	5.23e-09
ENSG00000069702	TGFBR3	-4.73178	5.25e-09
ENSG00000163331	DAPL1	4.43084	5.25e-09
ENSG00000167767	KRT80	6.03318	5.29e-09
ENSG00000129451	KLK10	5.02196	5.4e-09
ENSG00000112183	RBM24	-7.66712	5.46e-09
ENSG00000203747	FCGR3A	-8.38229	5.84e-09
ENSG00000095637	SORBS1	-5.63601	5.91e-09
ENSG00000134871	COL4A2	-5.01377	5.91e-09
ENSG00000154783	FGD5	-6.71134	5.98e-09
ENSG00000168542	COL3A1	-7.49025	5.98e-09
ENSG00000086205	FOLH1	-8.10908	6.17e-09
ENSG00000185069	KRT76	8.42272	6.34e-09
ENSG00000141449	GREB1L	-8.50321	6.56e-09
ENSG00000115008	IL1A	7.48019	6.68e-09
ENSG00000263639	MSMB	-7.53072	6.93e-09
ENSG00000109511	ANXA10	9.56967	6.94e-09
ENSG00000134917	ADAMTS8	-10.6747	6.96e-09
ENSG00000043462	LCP2	-7.76466	7.43e-09
ENSG00000122679	RAMP3	-10.5512	7.66e-09
ENSG00000139629	GALNT6	4.64661	7.99e-09
ENSG00000170454	KRT75	11.422	8.05e-09
ENSG00000110324	IL10RA	-6.89924	8.15e-09
ENSG00000142552	RCN3	-5.55876	8.32e-09
ENSG00000272398	CD24	4.04052	8.41e-09
ENSG00000158270	COLEC12	-7.45213	8.5e-09
ENSG00000175356	SCUBE2	-7.02194	8.55e-09
ENSG00000124205	EDN3	-10.548	8.74e-09
ENSG00000010610	CD4	-6.43954	8.75e-09
ENSG00000163132	MSX1	-5.18842	9.08e-09
ENSG00000086289	EPDR1	-4.50452	9.24e-09
ENSG00000197629	MPEG1	-10.4869	9.68e-09
ENSG00000159674	SPON2	-4.23281	9.74e-09
ENSG00000118526	TCF21	-6.65297	9.79e-09
ENSG00000137077	CCL21	-9.85068	9.99e-09
ENSG00000131634	TMEM204	-5.67072	1.03e-08
ENSG00000166825	ANPEP	-7.15662	1.08e-08
ENSG00000132465	JCHAIN	-9.77158	1.1e-08
ENSG00000048740	CELF2	-4.79468	1.14e-08
ENSG00000163207	IVL	8.37086	1.15e-08
ENSG00000076344	RGS11	-4.92155	1.22e-08
ENSG00000104324	CPQ	-4.31757	1.23e-08
ENSG00000162407	PPAP2B	-4.79241	1.25e-08
ENSG00000180875	GREM2	-7.35239	1.32e-08
ENSG00000166741	NNMT	-6.33432	1.34e-08
ENSG00000130052	STARD8	-6.5803	1.36e-08
ENSG00000151702	FLI1	-7.50267	1.36e-08
ENSG00000108381	ASPA	-6.45627	1.38e-08
ENSG00000174175	SELP	-10.4213	1.43e-08
ENSG00000159212	CLIC6	-5.45895	1.45e-08
ENSG00000069431	ABCC9	-5.91702	1.49e-08
ENSG00000137726	FXYD6	-5.9066	1.49e-08
ENSG00000126218	F10	-6.24878	1.56e-08
ENSG00000167244	IGF2	-8.45664	1.56e-08
ENSG00000136869	TLR4	-6.37245	1.59e-08
ENSG00000108405	P2RX1	-10.5359	1.6e-08
ENSG00000182168	UNC5C	-10.3819	1.63e-08
ENSG00000267505	CTC-296K1.3	-11.0563	1.65e-08
ENSG00000136842	TMOD1	-9.03979	1.68e-08
ENSG00000158560	DYNC1I1	-5.06786	1.78e-08
ENSG00000164161	HHIP	-7.54196	1.81e-08
ENSG00000103257	SLC7A5	4.72314	1.85e-08
ENSG00000165995	CACNB2	-5.80658	1.89e-08
ENSG00000106483	SFRP4	-9.67013	1.98e-08
ENSG00000014257	ACPP	-7.44604	2.06e-08
ENSG00000265107	GJA5	-10.5582	2.12e-08
ENSG00000142102	ATHL1	-3.99432	2.17e-08
ENSG00000149150	SLC43A1	-5.37139	2.17e-08
ENSG00000101470	TNNC2	-10.7005	2.24e-08
ENSG00000143387	CTSK	-4.69524	2.28e-08
ENSG00000134198	TSPAN2	-3.97208	2.37e-08
ENSG00000138356	AOX1	-4.32164	2.37e-08
ENSG00000123119	NECAB1	-6.96856	2.39e-08
ENSG00000198959	TGM2	-4.1283	2.47e-08
ENSG00000077157	PPP1R12B	-4.65155	2.54e-08
ENSG00000091831	ESR1	-5.21813	2.56e-08
ENSG00000267405	CTC-296K1.4	-10.7134	2.56e-08
ENSG00000128482	RNF112	-7.61889	2.62e-08
ENSG00000151789	ZNF385D	-7.33041	2.69e-08
ENSG00000171819	ANGPTL7	-5.12679	2.69e-08
ENSG00000090539	CHRD	-6.76006	2.74e-08
ENSG00000187699	C2orf88	-5.81192	2.9e-08
ENSG00000050628	PTGER3	-9.7119	2.96e-08
ENSG00000134853	PDGFRA	-5.03779	2.96e-08
ENSG00000118407	FILIP1	-7.17093	2.99e-08
ENSG00000184613	NELL2	-9.14824	3.06e-08
ENSG00000170390	DCLK2	-6.28119	3.29e-08
ENSG00000205221	VIT	-10.7452	3.4e-08
ENSG00000126785	RHOJ	-6.57988	3.45e-08
ENSG00000124491	F13A1	-10.6862	3.47e-08
ENSG00000002933	TMEM176A	-10.249	3.63e-08
ENSG00000070193	FGF10	-10.1904	3.72e-08
ENSG00000125384	PTGER2	-10.1976	3.82e-08
ENSG00000187513	GJA4	-10.2984	3.85e-08
ENSG00000211448	DIO2	-5.76604	3.89e-08
ENSG00000184905	TCEAL2	-5.10219	4.11e-08
ENSG00000112208	BAG2	-5.32044	4.17e-08
ENSG00000170989	S1PR1	-6.00524	4.18e-08
ENSG00000142173	COL6A2	-6.20138	4.22e-08
ENSG00000176092	AIM1L	5.60198	4.23e-08
ENSG00000187479	C11orf96	-4.44593	4.43e-08
ENSG00000169474	SPRR1A	10.1158	4.48e-08
ENSG00000165168	CYBB	-10.2897	4.53e-08
ENSG00000159784	FAM131B	6.27959	4.85e-08
ENSG00000144063	MALL	4.37525	4.95e-08
ENSG00000135424	ITGA7	-5.45444	4.96e-08
ENSG00000169439	SDC2	-4.21847	4.96e-08
ENSG00000171016	PYGO1	-5.1736	4.96e-08
ENSG00000113319	RASGRF2	-4.51091	5.14e-08
ENSG00000169126	ARMC4	-7.31856	5.22e-08
ENSG00000137959	IFI44L	-6.79116	5.23e-08
ENSG00000131378	RFTN1	-5.00231	5.26e-08
ENSG00000144218	AFF3	-9.43431	5.62e-08
ENSG00000128596	CCDC136	-4.49491	5.81e-08
ENSG00000158292	GPR153	4.2144	6.08e-08
ENSG00000169507	SLC38A11	-6.44555	6.11e-08
ENSG00000170624	SGCD	-9.43814	6.11e-08
ENSG00000136859	ANGPTL2	-4.06712	6.26e-08
ENSG00000162551	ALPL	-10.1235	6.46e-08
ENSG00000075884	ARHGAP15	-10.0769	6.66e-08
ENSG00000176435	CLEC14A	-6.37266	6.82e-08
ENSG00000140284	SLC27A2	4.58696	6.91e-08
ENSG00000168280	KIF5C	-6.1863	7.26e-08
ENSG00000162745	OLFML2B	-9.35833	7.27e-08
ENSG00000137486	ARRB1	-4.36322	7.39e-08
ENSG00000132965	ALOX5AP	-10.7316	7.4e-08
ENSG00000148357	HMCN2	-8.08106	7.49e-08
ENSG00000040731	CDH10	-10.02	7.72e-08
ENSG00000120156	TEK	-7.71955	7.73e-08
ENSG00000165186	PTCHD1	-7.72725	8.09e-08
ENSG00000206075	SERPINB5	5.46647	8.3e-08
ENSG00000175065	DSG4	11.0543	8.5e-08
ENSG00000174080	CTSF	-4.16246	8.91e-08
ENSG00000187848	P2RX2	-10.1095	9.09e-08
ENSG00000239474	KLHL41	-9.34053	9.25e-08
ENSG00000182511	FES	-4.49917	9.54e-08
ENSG00000110848	CD69	-9.98498	9.84e-08
ENSG00000130592	LSP1	-9.51845	1e-07
ENSG00000054938	CHRDL2	-10.4633	1.04e-07
ENSG00000185274	WBSCR17	-8.19278	1.05e-07
ENSG00000166147	FBN1	-6.3038	1.08e-07
ENSG00000167656	LY6D	5.3365	1.08e-07
ENSG00000142583	SLC2A5	-4.62561	1.14e-07
ENSG00000170891	CYTL1	-9.96894	1.14e-07
ENSG00000177494	ZBED2	6.17614	1.16e-07
ENSG00000183160	TMEM119	-9.92953	1.16e-07
ENSG00000128918	ALDH1A2	-6.13059	1.19e-07
ENSG00000170577	SIX2	-6.56876	1.19e-07
ENSG00000000938	FGR	-7.13228	1.22e-07
ENSG00000130413	STK33	-5.23886	1.27e-07
ENSG00000164188	RANBP3L	-7.15709	1.29e-07
ENSG00000157404	KIT	-4.82549	1.34e-07
ENSG00000179362	HMGN2P46	-6.41311	1.35e-07
ENSG00000118729	CASQ2	-10.931	1.38e-07
ENSG00000144481	TRPM8	-8.2572	1.39e-07
ENSG00000162989	KCNJ3	-10.5103	1.4e-07
ENSG00000173376	NDNF	-9.17545	1.43e-07
ENSG00000160255	ITGB2	-5.1796	1.53e-07
ENSG00000112782	CLIC5	-9.93434	1.54e-07
ENSG00000147027	TMEM47	-4.62079	1.57e-07
ENSG00000071991	CDH19	-9.84785	1.67e-07
ENSG00000137573	SULF1	-5.40641	1.72e-07
ENSG00000174600	CMKLR1	-10.1623	1.82e-07
ENSG00000178363	CALML3	5.71888	1.92e-07
ENSG00000106333	PCOLCE	-4.66915	2e-07
ENSG00000198844	ARHGEF15	-7.06412	2e-07
ENSG00000101265	RASSF2	-5.57851	2.06e-07
ENSG00000148655	C10orf11	-5.9536	2.08e-07
ENSG00000158869	FCER1G	-6.58465	2.08e-07
ENSG00000162733	DDR2	-6.46505	2.09e-07
ENSG00000152495	CAMK4	-6.03067	2.12e-07
ENSG00000166927	MS4A7	-8.81097	2.2e-07
ENSG00000138944	KIAA1644	-7.94841	2.25e-07
ENSG00000132702	HAPLN2	-6.82392	2.29e-07
ENSG00000150764	DIXDC1	-3.83118	2.33e-07
ENSG00000166535	A2ML1	5.55807	2.33e-07
ENSG00000234638	AC053503.6	-9.78019	2.33e-07
ENSG00000115252	PDE1A	-6.38026	2.34e-07
ENSG00000168530	MYL1	-27.7749	2.34e-07
ENSG00000154556	SORBS2	-4.03094	2.4e-07
ENSG00000077942	FBLN1	-3.66548	2.52e-07
ENSG00000120279	MYCT1	-6.54218	2.75e-07
ENSG00000164330	EBF1	-9.14939	2.75e-07
ENSG00000128573	FOXP2	-5.82503	2.84e-07
ENSG00000159176	CSRP1	-3.81367	2.88e-07
ENSG00000109321	AREG	5.69901	2.89e-07
ENSG00000178031	ADAMTSL1	-6.19212	2.92e-07
ENSG00000179761	PIPOX	-5.18768	2.92e-07
ENSG00000179144	GIMAP7	-9.7289	2.95e-07
ENSG00000130755	GMFG	-8.65312	3.05e-07
ENSG00000145721	LIX1	-10.2453	3.05e-07
ENSG00000151617	EDNRA	-4.03567	3.06e-07
ENSG00000118292	C1orf54	-5.07822	3.09e-07
ENSG00000143536	CRNN	8.74795	3.1e-07
ENSG00000259663	CTD-2314G24.2	-6.12236	3.13e-07
ENSG00000241839	PLEKHO2	-4.06341	3.19e-07
ENSG00000189057	FAM111B	4.98366	3.23e-07
ENSG00000225986	UBXN10-AS1	-10.5864	3.23e-07
ENSG00000146205	ANO7	-6.16354	3.4e-07
ENSG00000187824	TMEM220	-4.38576	3.47e-07
ENSG00000144810	COL8A1	-6.31875	3.64e-07
ENSG00000132688	NES	-4.29773	3.71e-07
ENSG00000131730	CKMT2	-5.44158	3.82e-07
ENSG00000120907	ADRA1A	-8.97101	3.93e-07
ENSG00000148053	NTRK2	-4.42236	3.99e-07
ENSG00000163235	TGFA	4.34683	3.99e-07
ENSG00000171860	C3AR1	-10.4432	3.99e-07
ENSG00000143125	PROK1	-9.75209	4.06e-07
ENSG00000012223	LTF	-7.73537	4.16e-07
ENSG00000020181	ADGRA2	-7.53377	4.25e-07
ENSG00000237949	LINC00844	-9.97011	4.26e-07
ENSG00000266524	GDF10	-9.83891	4.31e-07
ENSG00000066336	SPI1	-9.80052	4.36e-07
ENSG00000117020	AKT3	-4.39337	4.36e-07
ENSG00000118242	MREG	3.83469	4.39e-07
ENSG00000196611	MMP1	7.74847	4.4e-07
ENSG00000166105	GLB1L3	-8.91028	4.43e-07
ENSG00000150625	GPM6A	-10.0659	4.62e-07
ENSG00000166292	TMEM100	-7.61631	4.75e-07
ENSG00000169413	RNASE6	-10.3802	4.75e-07
ENSG00000257542	OR7E47P	-9.88769	4.83e-07
ENSG00000258274	RP11-887P2.5	-10.1628	4.83e-07
ENSG00000166960	CCDC178	-8.91147	4.89e-07
ENSG00000182010	RTKN2	4.09069	4.95e-07
ENSG00000104213	PDGFRL	-6.36859	5.12e-07
ENSG00000145362	ANK2	-6.43134	5.28e-07
ENSG00000158445	KCNB1	-6.39368	5.28e-07
ENSG00000250423	KIAA1210	-10.2817	5.38e-07
ENSG00000079102	RUNX1T1	-9.58148	5.51e-07
ENSG00000260314	MRC1	-9.98584	5.53e-07
ENSG00000133574	GIMAP4	-8.87966	5.66e-07
ENSG00000179915	NRXN1	-9.86239	5.79e-07
ENSG00000108370	RGS9	-5.79463	5.83e-07
ENSG00000187498	COL4A1	-5.42617	5.84e-07
ENSG00000177363	LRRN4CL	-4.52918	5.93e-07
ENSG00000181195	PENK	-6.74005	6.03e-07
ENSG00000178538	CA8	-10.3206	6.13e-07
ENSG00000186479	RGS7BP	-5.6142	6.34e-07
ENSG00000215018	COL28A1	-5.87946	6.34e-07
ENSG00000167332	OR51E2	-8.88535	6.56e-07
ENSG00000145147	SLIT2	-4.01338	6.68e-07
ENSG00000150510	FAM124A	-5.17197	6.68e-07
ENSG00000165323	FAT3	-5.49618	6.69e-07
ENSG00000013297	CLDN11	-4.21419	6.82e-07
ENSG00000154736	ADAMTS5	-5.8294	6.88e-07
ENSG00000124785	NRN1	-5.43932	6.92e-07
ENSG00000153707	PTPRD	-7.10738	6.92e-07
ENSG00000171401	KRT13	6.39675	7.01e-07
ENSG00000169508	GPR183	-7.00326	7.12e-07
ENSG00000157445	CACNA2D3	-9.82414	7.16e-07
ENSG00000254510	RP11-867G23.10	-9.80631	7.5e-07
ENSG00000112559	MDFI	4.05276	7.57e-07
ENSG00000111245	MYL2	-26.6823	7.85e-07
ENSG00000115956	PLEK	-9.66532	7.96e-07
ENSG00000241684	ADAMTS9-AS2	-8.98265	7.97e-07
ENSG00000172005	MAL	-9.07125	8.01e-07
ENSG00000230630	DNM3OS	-9.70098	8.21e-07
ENSG00000171408	PDE7B	-8.78921	8.27e-07
ENSG00000197635	DPP4	-6.95318	8.59e-07
ENSG00000183346	C10orf107	-9.85925	8.6e-07
ENSG00000261685	RP11-401P9.4	-7.05926	8.64e-07
ENSG00000121068	TBX2	-4.80007	8.85e-07
ENSG00000122574	WIPF3	-4.64009	9.11e-07
ENSG00000135447	PPP1R1A	-10.3563	9.13e-07
ENSG00000140678	ITGAX	-8.78896	9.26e-07
ENSG00000100302	RASD2	-4.90013	9.28e-07
ENSG00000148773	MKI67	3.9629	9.49e-07
ENSG00000138735	PDE5A	-4.74876	9.94e-07
ENSG00000089820	ARHGAP4	-4.07821	1.02e-06
ENSG00000164736	SOX17	-9.31173	1.03e-06
ENSG00000180616	SSTR2	-6.11097	1.03e-06
ENSG00000238271	IFNWP19	6.23744	1.03e-06
ENSG00000150893	FREM2	-4.10187	1.04e-06
ENSG00000152056	AP1S3	4.14449	1.04e-06
ENSG00000176153	GPX2	5.57411	1.04e-06
ENSG00000172548	NIPAL4	3.97075	1.12e-06
ENSG00000253250	C8orf88	-5.84455	1.16e-06
ENSG00000028277	POU2F2	-4.78118	1.19e-06
ENSG00000134533	RERG	-3.94077	1.2e-06
ENSG00000134775	FHOD3	-3.6237	1.2e-06
ENSG00000113924	HGD	-6.79096	1.21e-06
ENSG00000153714	LURAP1L	4.00756	1.21e-06
ENSG00000171714	ANO5	-5.88925	1.22e-06
ENSG00000196616	ADH1B	-9.73273	1.22e-06
ENSG00000085563	ABCB1	-5.53862	1.24e-06
ENSG00000259976	RP11-553L6.5	-3.84727	1.28e-06
ENSG00000111077	TNS2	-3.67154	1.3e-06
ENSG00000155849	ELMO1	-5.89337	1.32e-06
ENSG00000251321	PCAT4	-9.30344	1.33e-06
ENSG00000111452	ADGRD1	-9.58031	1.39e-06
ENSG00000133561	GIMAP6	-6.06855	1.4e-06
ENSG00000133808	MICALCL	5.16376	1.43e-06
ENSG00000183722	LHFP	-3.47287	1.43e-06
ENSG00000149948	HMGA2	7.71419	1.45e-06
ENSG00000108342	CSF3	-7.92921	1.47e-06
ENSG00000108798	ABI3	-9.36466	1.48e-06
ENSG00000169213	RAB3B	-6.58441	1.48e-06
ENSG00000197256	KANK2	-3.38424	1.48e-06
ENSG00000118785	SPP1	-9.5198	1.5e-06
ENSG00000133116	KL	-9.34861	1.55e-06
ENSG00000156049	GNA14	-4.76903	1.55e-06
ENSG00000100626	GALNT16	-5.13998	1.56e-06
ENSG00000058866	DGKG	-5.97249	1.57e-06
ENSG00000128284	APOL3	-3.83275	1.6e-06
ENSG00000146215	CRIP3	-9.40167	1.64e-06
ENSG00000121743	GJA3	6.23454	1.65e-06
ENSG00000147166	ITGB1BP2	-5.69946	1.65e-06
ENSG00000152049	KCNE4	-4.70012	1.65e-06
ENSG00000138646	HERC5	-4.93125	1.7e-06
ENSG00000101955	SRPX	-4.11298	1.72e-06
ENSG00000186439	TRDN	-25.9418	1.73e-06
ENSG00000172348	RCAN2	-5.65981	1.75e-06
ENSG00000131016	AKAP12	-3.87542	1.76e-06
ENSG00000072818	ACAP1	-4.39353	1.8e-06
ENSG00000133121	STARD13	-3.59205	1.8e-06
ENSG00000137309	HMGA1	3.84225	1.8e-06
ENSG00000147588	PMP2	-9.39494	1.8e-06
ENSG00000085741	WNT11	-9.3988	1.83e-06
ENSG00000100285	NEFH	-6.86036	1.86e-06
ENSG00000104490	NCALD	-4.95267	1.9e-06
ENSG00000140538	NTRK3	-9.53855	1.91e-06
ENSG00000131018	SYNE1	-4.84219	1.92e-06
ENSG00000140968	IRF8	-9.42589	1.93e-06
ENSG00000123342	MMP19	-8.70509	1.99e-06
ENSG00000166432	ZMAT1	-3.7842	2.06e-06
ENSG00000183844	FAM3B	-5.92914	2.07e-06
ENSG00000038945	MSR1	-10.1261	2.1e-06
ENSG00000075073	TACR2	-4.60083	2.1e-06
ENSG00000099194	SCD	4.43169	2.1e-06
ENSG00000113594	LIFR	-3.3186	2.13e-06
ENSG00000135454	B4GALNT1	-6.54879	2.15e-06
ENSG00000196793	ZNF239	-5.66473	2.2e-06
ENSG00000178162	FAR2P2	-5.16982	2.22e-06
ENSG00000078549	ADCYAP1R1	-9.28102	2.24e-06
ENSG00000081237	PTPRC	-8.49406	2.24e-06
ENSG00000105419	MEIS3	-5.38934	2.24e-06
ENSG00000148798	INA	6.08583	2.25e-06
ENSG00000185339	TCN2	-3.53655	2.26e-06
ENSG00000196338	NLGN3	-4.19267	2.26e-06
ENSG00000029153	ARNTL2	4.30351	2.27e-06
ENSG00000101670	LIPG	4.31619	2.28e-06
ENSG00000143556	S100A7	7.09981	2.31e-06
ENSG00000266714	MYO15B	-3.69988	2.31e-06
ENSG00000267107	PCAT19	-9.28011	2.36e-06
ENSG00000184995	IFNE	5.50669	2.4e-06
ENSG00000115325	DOK1	-5.48812	2.45e-06
ENSG00000167157	PRRX2	-4.60293	2.5e-06
ENSG00000130303	BST2	-5.04065	2.51e-06
ENSG00000149534	MS4A2	-8.76129	2.51e-06
ENSG00000183963	SMTN	-3.17846	2.51e-06
ENSG00000108515	ENO3	-6.07215	2.52e-06
ENSG00000165304	MELK	4.41284	2.52e-06
ENSG00000140853	NLRC5	-4.32047	2.54e-06
ENSG00000161896	IP6K3	-8.62885	2.54e-06
ENSG00000167994	RAB3IL1	-5.94555	2.58e-06
ENSG00000099219	ERMP1	3.8014	2.62e-06
ENSG00000091986	CCDC80	-5.62562	2.64e-06
ENSG00000276480	MYH11	-9.83839	2.66e-06
ENSG00000109794	FAM149A	-4.25675	2.69e-06
ENSG00000046653	GPM6B	-3.33736	2.72e-06
ENSG00000117724	CENPF	3.83606	2.74e-06
ENSG00000138685	FGF2	-4.38908	2.78e-06
ENSG00000235505	RP11-693N9.2	-9.34175	2.8e-06
ENSG00000121871	SLITRK3	-9.18998	2.85e-06
ENSG00000162373	BEND5	-4.79704	2.92e-06
ENSG00000165973	NELL1	-9.51221	2.98e-06
ENSG00000170955	PRKCDBP	-3.94315	2.99e-06
ENSG00000186310	NAP1L3	-6.99116	3.03e-06
ENSG00000137094	DNAJB5	-3.55461	3.08e-06
ENSG00000204161	C10orf128	-8.58106	3.08e-06
ENSG00000103044	HAS3	4.97728	3.09e-06
ENSG00000120729	MYOT	-6.24269	3.16e-06
ENSG00000240045	RP11-451G4.2	-25.3475	3.16e-06
ENSG00000122824	NUDT10	-4.41989	3.17e-06
ENSG00000124466	LYPD3	5.35424	3.21e-06
ENSG00000134020	PEBP4	-9.33741	3.23e-06
ENSG00000164930	FZD6	3.15758	3.23e-06
ENSG00000104892	KLC3	3.86748	3.24e-06
ENSG00000009694	TENM1	-7.24386	3.26e-06
ENSG00000204936	CD177	-9.10509	3.26e-06
ENSG00000143028	SYPL2	-6.50061	3.33e-06
ENSG00000169291	SHE	-5.69042	3.34e-06
ENSG00000203685	C1orf95	-6.47567	3.34e-06
ENSG00000169258	GPRIN1	7.02182	3.38e-06
ENSG00000175874	CREG2	9.37439	3.38e-06
ENSG00000140287	HDC	-5.6876	3.39e-06
ENSG00000167654	ATCAY	-9.14384	3.46e-06
ENSG00000142303	ADAMTS10	-8.82969	3.48e-06
ENSG00000146352	CLVS2	-9.34613	3.55e-06
ENSG00000106819	ASPN	-9.15503	3.65e-06
ENSG00000179954	SSC5D	-6.28476	3.7e-06
ENSG00000187688	TRPV2	-9.18194	3.7e-06
ENSG00000134769	DTNA	-4.42853	3.74e-06
ENSG00000107984	DKK1	3.64883	3.75e-06
ENSG00000145428	RNF175	-5.70578	3.75e-06
ENSG00000006118	TMEM132A	4.62943	3.76e-06
ENSG00000153976	HS3ST3A1	-8.38138	3.76e-06
ENSG00000110934	BIN2	-9.23517	3.77e-06
ENSG00000105974	CAV1	-3.49593	3.79e-06
ENSG00000107719	PALD1	-4.69197	3.9e-06
ENSG00000137809	ITGA11	-6.44569	4.03e-06
ENSG00000111981	ULBP1	6.26213	4.06e-06
ENSG00000155629	PIK3AP1	-5.60318	4.11e-06
ENSG00000109610	SOD3	-3.25401	4.12e-06
ENSG00000128965	CHAC1	3.61139	4.3e-06
ENSG00000162576	MXRA8	-3.84959	4.3e-06
ENSG00000168497	SDPR	-4.39559	4.3e-06
ENSG00000228987	HLA-DRA	-9.95771	4.35e-06
ENSG00000110076	NRXN2	-9.652	4.36e-06
ENSG00000185052	SLC24A3	-4.82402	4.37e-06
ENSG00000144837	PLA1A	-5.44127	4.38e-06
ENSG00000198125	MB	-7.25009	4.42e-06
ENSG00000163209	SPRR3	9.16837	4.49e-06
ENSG00000184160	ADRA2C	-7.4679	4.52e-06
ENSG00000074410	CA12	3.80955	4.53e-06
ENSG00000138964	PARVG	-8.66335	4.53e-06
ENSG00000198795	ZNF521	-5.49484	4.56e-06
ENSG00000184226	PCDH9	-5.53333	4.57e-06
ENSG00000129675	ARHGEF6	-4.39602	4.61e-06
ENSG00000196126	HLA-DRB1	-9.34124	4.62e-06
ENSG00000109906	ZBTB16	-8.71079	4.65e-06
ENSG00000166086	JAM3	-4.77963	4.74e-06
ENSG00000133392	MYH11	-9.2172	4.77e-06
ENSG00000198848	CES1	-9.08252	4.77e-06
ENSG00000186081	KRT5	5.63709	4.78e-06
ENSG00000255248	RP11-166D19.1	-4.11084	4.8e-06
ENSG00000160539	PPAPDC3	-8.36996	4.83e-06
ENSG00000073737	DHRS9	6.41169	4.87e-06
ENSG00000126709	IFI6	-4.20124	4.87e-06
ENSG00000115468	EFHD1	-4.90093	4.89e-06
ENSG00000146151	HMGCLL1	-9.4486	4.89e-06
ENSG00000182575	NXPH3	-5.28219	4.89e-06
ENSG00000163618	CADPS	-7.91851	5e-06
ENSG00000246985	SOCS2-AS1	-3.84907	5e-06
ENSG00000259370	RP11-1069G10.1	-9.829	5e-06
ENSG00000134827	TCN1	6.37348	5.05e-06
ENSG00000128510	CPA4	4.6095	5.07e-06
ENSG00000121207	LRAT	3.71855	5.19e-06
ENSG00000136250	AOAH	-9.51983	5.29e-06
ENSG00000089472	HEPH	-5.93906	5.51e-06
ENSG00000280323	AC053503.12	-9.26508	5.53e-06
ENSG00000183486	MX2	-5.13659	5.69e-06
ENSG00000061455	PRDM6	-4.65991	5.76e-06
ENSG00000171873	ADRA1D	-9.0285	5.76e-06
ENSG00000105989	WNT2	-9.22556	5.79e-06
ENSG00000137841	PLCB2	-6.23435	5.87e-06
ENSG00000228278	ORM2	-9.55594	5.89e-06
ENSG00000125414	MYH2	-24.7071	5.92e-06
ENSG00000184524	CEND1	-7.62557	5.98e-06
ENSG00000229295	HLA-DPB1	-9.49037	6.03e-06
ENSG00000163106	HPGDS	-9.47159	6.09e-06
ENSG00000143226	FCGR2A	-6.82855	6.1e-06
ENSG00000185739	SRL	-8.70465	6.13e-06
ENSG00000264207	RP11-196G18.23	-4.70423	6.2e-06
ENSG00000188643	S100A16	3.36192	6.37e-06
ENSG00000089225	TBX5	-9.509	6.61e-06
ENSG00000111404	RERGL	-8.32739	6.62e-06
ENSG00000140450	ARRDC4	3.17864	6.69e-06
ENSG00000230708	HLA-DPB1	-8.99708	6.71e-06
ENSG00000122180	MYOG	-24.5697	6.8e-06
ENSG00000178919	FOXE1	5.51348	6.98e-06
ENSG00000172724	CCL19	-9.0365	7e-06
ENSG00000042062	FAM65C	-4.95651	7.16e-06
ENSG00000148680	HTR7	4.47707	7.24e-06
ENSG00000125675	GRIA3	-9.03626	7.33e-06
ENSG00000248890	HHIP-AS1	-7.11449	7.4e-06
ENSG00000214402	LCNL1	-9.5415	7.51e-06
ENSG00000019991	HGF	-5.36542	7.52e-06
ENSG00000171303	KCNK3	-7.07001	7.64e-06
ENSG00000196083	IL1RAP	3.57552	7.64e-06
ENSG00000132514	CLEC10A	-8.60374	7.65e-06
ENSG00000168685	IL7R	-8.49542	7.88e-06
ENSG00000214063	TSPAN4	-3.45085	8.09e-06
ENSG00000162174	ASRGL1	-6.37419	8.1e-06
ENSG00000166341	DCHS1	-5.45111	8.26e-06
ENSG00000112214	FHL5	-9.51294	8.73e-06
ENSG00000129682	FGF13	-4.00074	8.76e-06
ENSG00000198336	MYL4	-24.3196	8.78e-06
ENSG00000138722	MMRN1	-8.53875	8.9e-06
ENSG00000105122	RASAL3	-8.17903	8.93e-06
ENSG00000126561	STAT5A	-3.40078	9.04e-06
ENSG00000206240	HLA-DRB1	-9.59873	9.09e-06
ENSG00000175793	SFN	4.90419	9.1e-06
ENSG00000280623	PCAT14	-8.1422	9.1e-06
ENSG00000174807	CD248	-3.92532	9.33e-06
ENSG00000153446	C16orf89	-9.00487	9.37e-06
ENSG00000188677	PARVB	-3.93977	9.53e-06
ENSG00000101096	NFATC2	-4.63511	9.63e-06
ENSG00000128714	HOXD13	-3.43472	9.63e-06
ENSG00000277734	TRAC	-5.16698	9.67e-06
ENSG00000153814	JAZF1	-4.49697	9.7e-06
ENSG00000164520	RAET1E	5.35248	9.71e-06
ENSG00000248587	GDNF-AS1	-8.89696	9.71e-06
ENSG00000088543	C3orf18	-3.74797	9.73e-06
ENSG00000088882	CPXM1	-4.17985	9.76e-06
ENSG00000160191	PDE9A	-4.18891	9.77e-06
ENSG00000117394	SLC2A1	3.84194	9.84e-06
ENSG00000102445	KIAA0226L	-8.90521	9.86e-06
ENSG00000185046	ANKS1B	-6.67662	9.86e-06
ENSG00000132622	HSPA12B	-7.07747	9.91e-06
ENSG00000129170	CSRP3	-24.1749	1e-05
ENSG00000112799	LY86	-9.329	1.02e-05
ENSG00000091482	SMPX	-24.1489	1.03e-05
ENSG00000112378	PERP	3.63615	1.03e-05
ENSG00000129151	BBOX1	4.12411	1.04e-05
ENSG00000109819	PPARGC1A	-5.05217	1.07e-05
ENSG00000166823	MESP1	-7.1223	1.07e-05
ENSG00000110876	SELPLG	-7.29013	1.08e-05
ENSG00000137727	ARHGAP20	-6.10062	1.08e-05
ENSG00000067840	PDZD4	-4.23517	1.09e-05
ENSG00000151572	ANO4	-9.24446	1.09e-05
ENSG00000073910	FRY	-3.48722	1.1e-05
ENSG00000135744	AGT	-5.82532	1.1e-05
ENSG00000152137	HSPB8	-3.87345	1.12e-05
ENSG00000105737	GRIK5	-5.63996	1.13e-05
ENSG00000134516	DOCK2	-8.13969	1.13e-05
ENSG00000153993	SEMA3D	-5.32442	1.13e-05
ENSG00000107742	SPOCK2	-6.29897	1.16e-05
ENSG00000149599	DUSP15	-5.53568	1.16e-05
ENSG00000163909	HEYL	-5.78902	1.16e-05
ENSG00000096088	PGC	-9.73756	1.18e-05
ENSG00000171889	MIR31HG	4.69461	1.18e-05
ENSG00000111879	FAM184A	-3.80151	1.19e-05
ENSG00000127528	KLF2	-3.61503	1.19e-05
ENSG00000172399	MYOZ2	-9.38153	1.19e-05
ENSG00000186007	LEMD1	5.04947	1.19e-05
ENSG00000228080	HLA-DRB1	-7.24571	1.19e-05
ENSG00000139220	PPFIA2	-8.87599	1.2e-05
ENSG00000146013	GFRA3	-9.1298	1.2e-05
ENSG00000116833	NR5A2	-8.93563	1.21e-05
ENSG00000138435	CHRNA1	-23.9689	1.21e-05
ENSG00000188488	SERPINA5	-7.09732	1.21e-05
ENSG00000165617	DACT1	-3.66411	1.23e-05
ENSG00000115414	FN1	-3.88712	1.24e-05
ENSG00000164251	F2RL1	4.71761	1.24e-05
ENSG00000101098	RIMS4	-8.83739	1.25e-05
ENSG00000173991	TCAP	-6.74148	1.25e-05
ENSG00000197291	RAMP2-AS1	-8.8425	1.26e-05
ENSG00000166401	SERPINB8	3.24935	1.27e-05
ENSG00000143248	RGS5	-4.8709	1.28e-05
ENSG00000244486	SCARF2	-3.84922	1.32e-05
ENSG00000108018	SORCS1	-7.23223	1.34e-05
ENSG00000239697	TNFSF12	-4.31726	1.36e-05
ENSG00000259207	ITGB3	-7.25117	1.38e-05
ENSG00000075035	WSCD2	-5.64508	1.43e-05
ENSG00000120278	PLEKHG1	3.09445	1.44e-05
ENSG00000186642	PDE2A	-5.49696	1.48e-05
ENSG00000154133	ROBO4	-4.6054	1.53e-05
ENSG00000175538	KCNE3	-5.12044	1.53e-05
ENSG00000156535	CD109	3.08297	1.54e-05
ENSG00000186767	SPIN4	3.20855	1.54e-05
ENSG00000231991	ANXA2P2	3.16756	1.54e-05
ENSG00000173705	SUSD5	-6.92974	1.55e-05
ENSG00000188536	HBA2	-9.58893	1.55e-05
ENSG00000138615	CILP	-5.29237	1.56e-05
ENSG00000196353	CPNE4	-5.53061	1.57e-05
ENSG00000116824	CD2	-9.01404	1.58e-05
ENSG00000091137	SLC26A4	-7.48263	1.6e-05
ENSG00000144724	PTPRG	-3.46707	1.61e-05
ENSG00000118004	COLEC11	-8.85154	1.63e-05
ENSG00000197614	MFAP5	-8.85154	1.63e-05
ENSG00000166448	TMEM130	-8.95622	1.65e-05
ENSG00000078328	RBFOX1	-8.8229	1.66e-05
ENSG00000128422	KRT17	4.79779	1.66e-05
ENSG00000154175	ABI3BP	-4.63133	1.67e-05
ENSG00000165891	E2F7	4.45041	1.67e-05
ENSG00000100060	MFNG	-5.77358	1.69e-05
ENSG00000131196	NFATC1	-4.92592	1.69e-05
ENSG00000211689	TRGC1	-8.95723	1.71e-05
ENSG00000254535	PABPC4L	-5.03671	1.71e-05
ENSG00000004799	PDK4	-5.10239	1.73e-05
ENSG00000163191	S100A11	3.08536	1.73e-05
ENSG00000104903	LYL1	-8.4652	1.76e-05
ENSG00000172985	SH3RF3	-3.74857	1.78e-05
ENSG00000115165	CYTIP	-8.92364	1.79e-05
ENSG00000164465	DCBLD1	3.67695	1.81e-05
ENSG00000236333	TRHDE-AS1	-8.7574	1.84e-05
ENSG00000143195	ILDR2	-7.96295	1.92e-05
ENSG00000156970	BUB1B	4.30501	1.92e-05
ENSG00000163815	CLEC3B	-7.1694	1.92e-05
ENSG00000135636	DYSF	-4.86392	1.94e-05
ENSG00000100055	CYTH4	-5.00616	1.99e-05
ENSG00000183807	FAM162B	-8.10728	1.99e-05
ENSG00000197632	SERPINB2	8.38588	1.99e-05
ENSG00000154258	ABCA9	-5.72167	2e-05
ENSG00000162367	TAL1	-8.76298	2.04e-05
ENSG00000149328	GLB1L2	-3.26234	2.06e-05
ENSG00000189056	RELN	-5.61631	2.08e-05
ENSG00000171791	BCL2	-4.12624	2.09e-05
ENSG00000168032	ENTPD3	3.31725	2.14e-05
ENSG00000177791	MYOZ1	-7.59558	2.16e-05
ENSG00000179639	FCER1A	-8.70828	2.22e-05
ENSG00000008517	IL32	-4.59704	2.23e-05
ENSG00000160097	FNDC5	-8.5125	2.23e-05
ENSG00000053328	METTL24	-8.76229	2.24e-05
ENSG00000087258	GNAO1	-6.57333	2.24e-05
ENSG00000155816	FMN2	-8.69208	2.24e-05
ENSG00000140519	RHCG	6.13179	2.26e-05
ENSG00000112149	CD83	-4.11656	2.27e-05
ENSG00000164825	DEFB1	4.17522	2.28e-05
ENSG00000181458	TMEM45A	3.75271	2.34e-05
ENSG00000114200	BCHE	-4.91506	2.36e-05
ENSG00000102935	ZNF423	-5.20268	2.41e-05
ENSG00000137648	TMPRSS4	5.72652	2.42e-05
ENSG00000197261	C6orf141	4.23546	2.44e-05
ENSG00000130635	COL5A1	-3.36708	2.45e-05
ENSG00000158859	ADAMTS4	-5.0788	2.45e-05
ENSG00000124107	SLPI	4.33677	2.46e-05
ENSG00000149564	ESAM	-4.41314	2.47e-05
ENSG00000198846	TOX	-7.13677	2.47e-05
ENSG00000088827	SIGLEC1	-9.10436	2.49e-05
ENSG00000129596	CDO1	-4.35226	2.52e-05
ENSG00000163359	COL6A3	-5.29295	2.52e-05
ENSG00000182621	PLCB1	-3.24297	2.52e-05
ENSG00000215452	ZNF663P	-4.26275	2.52e-05
ENSG00000131055	COX4I2	-8.8955	2.59e-05
ENSG00000094804	CDC6	3.48774	2.6e-05
ENSG00000113396	SLC27A6	-7.94827	2.63e-05
ENSG00000180785	OR51E1	-8.99476	2.63e-05
ENSG00000118523	CTGF	-5.35176	2.64e-05
ENSG00000165810	BTNL9	-4.1216	2.66e-05
ENSG00000163993	S100P	4.24052	2.69e-05
ENSG00000005844	ITGAL	-6.67539	2.73e-05
ENSG00000204866	IGFL2	23.1193	2.73e-05
ENSG00000133083	DCLK1	-4.02953	2.74e-05
ENSG00000005249	PRKAR2B	-4.1154	2.76e-05
ENSG00000152270	PDE3B	-3.46524	2.76e-05
ENSG00000109101	FOXN1	4.76165	2.78e-05
ENSG00000132554	RGS22	-8.64026	2.79e-05
ENSG00000186998	EMID1	-4.4279	2.79e-05
ENSG00000262655	SPON1	-3.20415	2.79e-05
ENSG00000124772	CPNE5	-6.33709	2.84e-05
ENSG00000154262	ABCA6	-4.41097	2.84e-05
ENSG00000113248	PCDHB15	-4.49429	2.86e-05
ENSG00000122254	HS3ST2	-9.37754	2.98e-05
ENSG00000258537	FRMD6-AS2	-9.14304	3e-05
ENSG00000122756	CNTFR	-6.66401	3.01e-05
ENSG00000263155	MYZAP	-3.57033	3.09e-05
ENSG00000092009	CMA1	-9.21724	3.17e-05
ENSG00000034971	MYOC	-9.04483	3.2e-05
ENSG00000185811	IKZF1	-5.35022	3.2e-05
ENSG00000116745	RPE65	-6.23558	3.23e-05
ENSG00000127920	GNG11	-5.62915	3.23e-05
ENSG00000171051	FPR1	-8.80889	3.23e-05
ENSG00000198756	COLGALT2	-5.99165	3.23e-05
ENSG00000010319	SEMA3G	-5.40056	3.24e-05
ENSG00000171596	NMUR1	-8.82794	3.32e-05
ENSG00000105270	CLIP3	-3.44877	3.34e-05
ENSG00000203837	PNLIPRP3	8.63737	3.34e-05
ENSG00000153071	DAB2	-3.73377	3.5e-05
ENSG00000125285	SOX21	5.61945	3.54e-05
ENSG00000072657	TRHDE	-7.89404	3.56e-05
ENSG00000166963	MAP1A	-4.35768	3.6e-05
ENSG00000188505	NCCRP1	5.04011	3.63e-05
ENSG00000138792	ENPEP	-7.85109	3.64e-05
ENSG00000165379	LRFN5	-5.37152	3.64e-05
ENSG00000007312	CD79B	-8.69816	3.73e-05
ENSG00000105374	NKG7	-8.62712	3.74e-05
ENSG00000127743	IL17B	-8.74201	3.75e-05
ENSG00000182585	EPGN	6.97729	3.8e-05
ENSG00000145358	DDIT4L	-4.93528	3.92e-05
ENSG00000143494	VASH2	-5.93012	3.93e-05
ENSG00000078053	AMPH	-7.81143	3.98e-05
ENSG00000016082	ISL1	-5.55947	4e-05
ENSG00000131015	ULBP2	5.59162	4e-05
ENSG00000101463	SYNDIG1	-6.83858	4.11e-05
ENSG00000122122	SASH3	-8.54137	4.13e-05
ENSG00000133985	TTC9	3.37674	4.14e-05
ENSG00000087116	ADAMTS2	-5.46212	4.22e-05
ENSG00000139970	RTN1	-6.55526	4.22e-05
ENSG00000163273	NPPC	-8.32239	4.22e-05
ENSG00000170477	KRT4	5.17223	4.38e-05
ENSG00000171189	GRIK1	-7.73888	4.41e-05
ENSG00000136689	IL1RN	5.01923	4.42e-05
ENSG00000005379	BZRAP1	-4.38457	4.56e-05
ENSG00000152766	ANKRD22	3.16434	4.64e-05
ENSG00000188859	FAM78B	-8.62456	4.64e-05
ENSG00000151812	SLC35F4	-5.58053	4.65e-05
ENSG00000170558	CDH2	-8.7602	4.68e-05
ENSG00000169896	ITGAM	-6.25439	4.71e-05
ENSG00000142494	SLC47A1	-3.92986	4.74e-05
ENSG00000229526	KRT16P4	6.71312	4.74e-05
ENSG00000280429	AF001548.3	-8.60573	4.75e-05
ENSG00000154188	ANGPT1	-5.21902	4.8e-05
ENSG00000116157	GPX7	-4.04042	4.9e-05
ENSG00000128655	PDE11A	-6.65079	4.95e-05
ENSG00000188176	SMTNL2	-7.70924	4.96e-05
ENSG00000150995	ITPR1	-3.03369	4.98e-05
ENSG00000187474	FPR3	-8.55787	4.98e-05
ENSG00000111052	LIN7A	-6.33344	5e-05
ENSG00000106991	ENG	-3.50294	5.01e-05
ENSG00000143851	PTPN7	-8.53024	5.02e-05
ENSG00000169760	NLGN1	-5.47403	5.05e-05
ENSG00000197536	C5orf56	-3.61683	5.1e-05
ENSG00000176485	PLA2G16	-3.89523	5.12e-05
ENSG00000117091	CD48	-8.71013	5.13e-05
ENSG00000155962	CLIC2	-4.62194	5.27e-05
ENSG00000101331	CCM2L	-8.48195	5.3e-05
ENSG00000164488	DACT2	-9.19374	5.32e-05
ENSG00000005102	MEOX1	-6.87993	5.44e-05
ENSG00000171345	KRT19	4.48021	5.46e-05
ENSG00000168060	NAALADL1	-3.83906	5.55e-05
ENSG00000204262	COL5A2	-3.96065	5.57e-05
ENSG00000250510	GPR162	-5.87069	5.62e-05
ENSG00000136286	MYO1G	-8.48017	5.63e-05
ENSG00000198075	SULT1C4	-4.56855	5.66e-05
ENSG00000197245	FAM110D	-7.729	5.67e-05
ENSG00000204021	LIPK	8.71975	5.67e-05
ENSG00000263812	LINC00908	-8.51504	5.67e-05
ENSG00000179776	CDH5	-5.37553	5.7e-05
ENSG00000084636	COL16A1	-2.84091	5.74e-05
ENSG00000111249	CUX2	-7.38997	5.75e-05
ENSG00000182718	ANXA2	2.91111	5.75e-05
ENSG00000197594	ENPP1	-3.84892	5.76e-05
ENSG00000129173	E2F8	4.5206	5.78e-05
ENSG00000187017	ESPN	4.79341	5.79e-05
ENSG00000184838	PRR16	-5.63879	5.81e-05
ENSG00000069812	HES2	4.95237	5.95e-05
ENSG00000154227	CERS3	4.63598	6.05e-05
ENSG00000111913	FAM65B	-3.97439	6.12e-05
ENSG00000128567	PODXL	-3.55935	6.12e-05
ENSG00000023909	GCLM	2.92462	6.15e-05
ENSG00000077984	CST7	-8.68427	6.2e-05
ENSG00000154027	AK5	-5.02566	6.36e-05
ENSG00000204065	TCEAL5	-8.21203	6.73e-05
ENSG00000119138	KLF9	-4.12379	6.74e-05
ENSG00000267532	MIR497HG	-8.58394	6.74e-05
ENSG00000121966	CXCR4	-4.96863	6.84e-05
ENSG00000154928	EPHB1	-5.77508	6.84e-05
ENSG00000133800	LYVE1	-5.53205	6.85e-05
ENSG00000118473	SGIP1	-5.27124	6.86e-05
ENSG00000145649	GZMA	-8.65805	6.86e-05
ENSG00000165084	C8orf34	-6.25035	6.86e-05
ENSG00000225937	PCA3	-8.73698	6.86e-05
ENSG00000164318	EGFLAM	-5.07195	6.97e-05
ENSG00000206417	H1FX-AS1	-5.06558	6.99e-05
ENSG00000256508	MRGPRF-AS1	-8.46996	7.25e-05
ENSG00000163563	MNDA	-8.40794	7.26e-05
ENSG00000113361	CDH6	-8.41138	7.36e-05
ENSG00000137198	GMPR	-3.63685	7.41e-05
ENSG00000102554	KLF5	3.63725	7.49e-05
ENSG00000113448	PDE4D	-2.84641	7.52e-05
ENSG00000012124	CD22	-7.57775	7.54e-05
ENSG00000136630	HLX	-4.99742	7.54e-05
ENSG00000101057	MYBL2	4.1295	7.64e-05
ENSG00000004468	CD38	-5.78841	7.72e-05
ENSG00000119535	CSF3R	-7.62585	7.74e-05
ENSG00000062282	DGAT2	4.52752	7.85e-05
ENSG00000146386	ABRACL	3.09909	7.86e-05
ENSG00000123329	ARHGAP9	-5.00318	7.87e-05
ENSG00000124766	SOX4	2.85209	7.91e-05
ENSG00000275342	SGK223	3.49143	7.91e-05
ENSG00000169085	C8orf46	-5.48834	8.2e-05
ENSG00000129455	KLK8	7.42869	8.21e-05
ENSG00000160862	AZGP1	-6.53363	8.27e-05
ENSG00000235531	MSC-AS1	-8.52719	8.3e-05
ENSG00000150594	ADRA2A	-7.61597	8.31e-05
ENSG00000035862	TIMP2	-3.04577	8.35e-05
ENSG00000147697	GSDMC	4.67858	8.39e-05
ENSG00000277954	RP11-679B19.1	-4.81427	8.42e-05
ENSG00000096060	FKBP5	-4.3361	8.46e-05
ENSG00000114654	EFCC1	-6.01648	8.53e-05
ENSG00000074370	ATP2A3	-3.93368	8.56e-05
ENSG00000105538	RASIP1	-3.73783	8.62e-05
ENSG00000177614	PGBD5	3.86487	8.63e-05
ENSG00000178878	APOLD1	-4.22474	8.68e-05
ENSG00000214189	ZNF788	-5.79405	8.71e-05
ENSG00000159166	LAD1	5.25055	8.76e-05
ENSG00000211895	IGHA1	-8.67284	8.99e-05
ENSG00000118946	PCDH17	-6.55087	9.11e-05
ENSG00000205436	EXOC3L4	-5.82073	9.11e-05
ENSG00000130487	KLHDC7B	6.27311	9.14e-05
ENSG00000136717	BIN1	-3.39361	9.2e-05
ENSG00000239911	PRKAG2-AS1	-7.55506	9.2e-05
ENSG00000008118	CAMK1G	-7.553	9.25e-05
ENSG00000197705	KLHL14	-8.42818	9.32e-05
ENSG00000250360	CTD-2089N3.1	-8.34751	9.34e-05
ENSG00000127324	TSPAN8	-3.83691	9.42e-05
ENSG00000181467	RAP2B	2.90501	9.49e-05
ENSG00000104549	SQLE	3.24932	9.52e-05
ENSG00000258947	TUBB3	6.56364	9.55e-05
ENSG00000231721	LINC-PINT	-3.1453	9.94e-05
ENSG00000268089	GABRQ	-6.29332	9.96e-05
ENSG00000152784	PRDM8	-3.68277	0.000100784
ENSG00000184986	TMEM121	-5.41785	0.00010252
ENSG00000214313	AZGP1P1	-6.91843	0.000102655
ENSG00000126787	DLGAP5	4.30588	0.00010288
ENSG00000230500	MKX-AS1	-8.4305	0.00010288
ENSG00000147443	DOK2	-7.85377	0.000103455
ENSG00000172349	IL16	-4.79465	0.00010599
ENSG00000163017	ACTG2	-11.8874	0.000107311
ENSG00000166148	AVPR1A	-7.51962	0.000107335
ENSG00000161544	CYGB	-3.29129	0.000108003
ENSG00000128606	LRRC17	-4.24988	0.000108622
ENSG00000168243	GNG4	-5.47632	0.000108866
ENSG00000118308	LRMP	-5.82808	0.000109601
ENSG00000147257	GPC3	-5.16413	0.000110194
ENSG00000135127	CCDC64	3.98306	0.000110204
ENSG00000133878	DUSP26	-8.75421	0.000110355
ENSG00000231131	LINC01468	8.20767	0.000110355
ENSG00000105472	CLEC11A	-3.13922	0.000110443
ENSG00000227300	KRT16P2	5.22162	0.000110835
ENSG00000183098	GPC6	-3.96154	0.000110886
ENSG00000132639	SNAP25	-4.22058	0.000111064
ENSG00000137672	TRPC6	-3.85621	0.000112368
ENSG00000279526	AC011239.2	-7.28406	0.000112898
ENSG00000183091	NEB	-5.50847	0.000113938
ENSG00000226306	NPY6R	-7.03166	0.000114489
ENSG00000121067	SPOP	-3.40837	0.000114826
ENSG00000267280	TBX2-AS1	-4.67657	0.000114826
ENSG00000135324	MRAP2	-3.63454	0.00011537
ENSG00000088340	FER1L4	2.95733	0.00011562
ENSG00000125430	HS3ST3B1	-4.62055	0.000116899
ENSG00000065618	COL17A1	4.26336	0.000119348
ENSG00000145632	PLK2	3.11313	0.000119348
ENSG00000115318	LOXL3	-4.36447	0.00011963
ENSG00000158163	DZIP1L	-4.77003	0.000119714
ENSG00000142657	PGD	2.80777	0.000120204
ENSG00000223403	MEG9	-6.50389	0.000120204
ENSG00000173369	C1QB	-13.5845	0.000120324
ENSG00000091656	ZFHX4	-4.32516	0.000122148
ENSG00000215386	MIR99AHG	-4.05853	0.000122964
ENSG00000132854	KANK4	-8.75529	0.000123151
ENSG00000188452	CERKL	-7.6735	0.000123151
ENSG00000146197	SCUBE3	-4.00989	0.000124
ENSG00000171291	ZNF439	-3.71006	0.00012425
ENSG00000170458	CD14	-3.14293	0.000125156
ENSG00000105499	PLA2G4C	-4.26985	0.000125731
ENSG00000255399	TBX5-AS1	-8.235	0.000126249
ENSG00000167653	PSCA	4.20411	0.000127122
ENSG00000227036	LINC00511	4.38192	0.00012967
ENSG00000172020	GAP43	-8.76679	0.000130017
ENSG00000197415	VEPH1	-8.25918	0.000130622
ENSG00000165300	SLITRK5	-4.35695	0.000130866
ENSG00000106018	VIPR2	-8.03266	0.000131037
ENSG00000104332	SFRP1	-3.53071	0.000131487
ENSG00000166676	TVP23A	-5.609	0.000132445
ENSG00000183798	EMILIN3	-6.20388	0.000132907
ENSG00000170837	GPR27	-4.01997	0.000133043
ENSG00000103196	CRISPLD2	-3.31656	0.000133739
ENSG00000018280	SLC11A1	-6.96552	0.000134151
ENSG00000250056	LINC01018	-8.31072	0.000134816
ENSG00000205403	CFI	-4.07557	0.000135347
ENSG00000073792	IGF2BP2	4.08165	0.000137381
ENSG00000186529	CYP4F3	4.73481	0.000137398
ENSG00000135502	SLC26A10	-8.31464	0.000137885
ENSG00000112280	COL9A1	-8.70495	0.000138054
ENSG00000198771	RCSD1	-5.27479	0.000138054
ENSG00000109956	B3GAT1	-8.92347	0.000139105
ENSG00000172818	OVOL1	5.22344	0.000139167
ENSG00000135046	ANXA1	2.67257	0.000139876
ENSG00000151692	RNF144A	-3.45474	0.000139876
ENSG00000149256	TENM4	4.0005	0.000140584
ENSG00000185010	F8	-3.56739	0.000141977
ENSG00000023902	PLEKHO1	-4.09611	0.000142456
ENSG00000169418	NPR1	-4.79955	0.000142456
ENSG00000139874	SSTR1	-8.25211	0.000144441
ENSG00000214856	KRT16P1	5.23679	0.00014554
ENSG00000162618	ADGRL4	-5.18634	0.000145599
ENSG00000108821	COL1A1	-3.52627	0.000147104
ENSG00000166928	MS4A14	-9.01083	0.00014933
ENSG00000101460	MAP1LC3A	-3.5774	0.000149355
ENSG00000164236	ANKRD33B	-5.68231	0.000152496
ENSG00000224259	LINC01133	3.1999	0.000154508
ENSG00000104415	WISP1	-5.34649	0.000156311
ENSG00000108176	DNAJC12	-4.2964	0.000158454
ENSG00000065609	SNAP91	-8.45975	0.000158883
ENSG00000154822	PLCL2	-4.55825	0.000160109
ENSG00000135097	MSI1	-8.24454	0.000161983
ENSG00000186832	KRT16	6.06903	0.000163778
ENSG00000103316	CRYM	-5.33243	0.000166429
ENSG00000115884	SDC1	4.49773	0.000168781
ENSG00000125144	MT1G	-3.0836	0.000169134
ENSG00000023445	BIRC3	-3.41502	0.000169286
ENSG00000168306	ACOX2	-2.97812	0.000169286
ENSG00000269235	ZNF350-AS1	-8.19704	0.000169428
ENSG00000186827	TNFRSF4	-8.18453	0.000169933
ENSG00000204136	GGTA1P	-4.41624	0.000169985
ENSG00000168621	GDNF	-7.5267	0.000175203
ENSG00000265190	ANXA8	4.42122	0.000175203
ENSG00000163430	FSTL1	-2.88569	0.000176303
ENSG00000167553	TUBA1C	2.72247	0.00017663
ENSG00000231672	DIRC3	-8.42908	0.00017841
ENSG00000082482	KCNK2	-8.28397	0.000178941
ENSG00000092969	TGFB2	-3.08928	0.00018166
ENSG00000104951	IL4I1	-8.31636	0.000185641
ENSG00000253161	LINC01605	5.53258	0.000186163
ENSG00000123096	SSPN	-3.2667	0.000186912
ENSG00000203883	SOX18	-4.53726	0.000187464
ENSG00000250241	RP11-9G1.3	-8.62482	0.00019011
ENSG00000169607	CKAP2L	3.82384	0.000190398
ENSG00000231346	LINC01160	-7.36829	0.000190398
ENSG00000171659	GPR34	-6.6485	0.000190451
ENSG00000110799	VWF	-3.71559	0.000195223
ENSG00000168476	REEP4	3.11311	0.000199555
ENSG00000105427	CNFN	3.4647	0.000201858
ENSG00000243335	KCTD7	-3.2063	0.000201858
ENSG00000180525	PRR26	-5.71912	0.000203487
ENSG00000279117	CTD-2562J17.6	-5.19184	0.000204372
ENSG00000116031	CD207	-8.54235	0.000205142
ENSG00000115085	ZAP70	-6.50086	0.000205384
ENSG00000134532	SOX5	-5.3921	0.000205421
ENSG00000142227	EMP3	-4.15781	0.00020751
ENSG00000122035	RASL11A	-3.90955	0.000211586
ENSG00000179869	ABCA13	5.57848	0.000212171
ENSG00000077684	JADE1	-3.14817	0.000212697
ENSG00000155307	SAMSN1	-7.36118	0.000213178
ENSG00000058085	LAMC2	4.30348	0.000214535
ENSG00000079337	RAPGEF3	-2.86399	0.000218572
ENSG00000185862	EVI2B	-7.47532	0.000221674
ENSG00000182916	TCEAL7	-4.29143	0.00022347
ENSG00000228221	LINC00578	-7.40626	0.000223726
ENSG00000235501	RP4-639F20.1	-3.65521	0.000224592
ENSG00000198417	MT1F	-3.99291	0.000225701
ENSG00000160219	GAB3	-7.34874	0.000226053
ENSG00000159527	PGLYRP3	8.91963	0.000228754
ENSG00000170500	LONRF2	-3.04546	0.000230454
ENSG00000113296	THBS4	-3.18033	0.000231947
ENSG00000071205	ARHGAP10	-3.3201	0.0002322
ENSG00000145934	TENM2	3.65994	0.000233963
ENSG00000261490	RP11-448G15.3	-3.20569	0.000233963
ENSG00000156675	RAB11FIP1	3.70835	0.000235361
ENSG00000132718	SYT11	-3.20141	0.000238929
ENSG00000167037	SGSM1	-6.4716	0.000239069
ENSG00000169245	CXCL10	-5.39352	0.000240489
ENSG00000272695	GAS6-AS2	-5.10649	0.000242124
ENSG00000141506	PIK3R5	-8.17801	0.000243133
ENSG00000169583	CLIC3	4.07589	0.000243588
ENSG00000163239	TDRD10	-8.43672	0.000244254
ENSG00000272971	RP11-284F21.11	-8.23107	0.000246078
ENSG00000151725	CENPU	3.61814	0.000248637
ENSG00000121152	NCAPH	3.84031	0.000249616
ENSG00000175745	NR2F1	-3.5979	0.000249616
ENSG00000113263	ITK	-8.15978	0.00025032
ENSG00000260077	RP11-254F7.2	-4.31313	0.000251883
ENSG00000275326	NOSTRIN	-6.04905	0.000253328
ENSG00000102837	OLFM4	-5.54476	0.000254178
ENSG00000173114	LRRN3	-6.14214	0.000254521
ENSG00000206052	DOK6	-8.36563	0.000254521
ENSG00000203722	RAET1G	4.72096	0.000255403
ENSG00000170476	MZB1	-5.56987	0.000255461
ENSG00000125810	CD93	-4.63868	0.0002604
ENSG00000008311	AASS	-3.13731	0.000263786
ENSG00000125851	PCSK2	-8.38312	0.000264211
ENSG00000272870	RP11-798M19.6	-4.50679	0.000266699
ENSG00000219438	FAM19A5	-7.26521	0.000267111
ENSG00000205362	MT1A	-6.94045	0.000267972
ENSG00000153956	CACNA2D1	-4.42861	0.00026816
ENSG00000102032	RENBP	-7.64411	0.000268419
ENSG00000143603	KCNN3	-4.98024	0.000268419
ENSG00000166501	PRKCB	-4.07371	0.000269156
ENSG00000164086	DUSP7	3.13713	0.000269717
ENSG00000179148	ALOXE3	5.94316	0.000269759
ENSG00000134321	RSAD2	-3.93053	0.000269806
ENSG00000109805	NCAPG	4.23678	0.000272431
ENSG00000272668	RP11-190A12.8	-5.74984	0.00027594
ENSG00000172889	EGFL7	-3.35332	0.000276559
ENSG00000214491	SEC14L6	-6.56541	0.000277136
ENSG00000133135	RNF128	3.62153	0.000278515
ENSG00000171848	RRM2	3.46876	0.000278515
ENSG00000230463	HLA-DRB3	-8.23934	0.000278909
ENSG00000165495	PKNOX2	-4.19618	0.000279767
ENSG00000133106	EPSTI1	-4.75304	0.000281364
ENSG00000182902	SLC25A18	-5.52335	0.000284702
ENSG00000227191	TRGC2	-8.09574	0.000284773
ENSG00000090889	KIF4A	3.72936	0.000290998
ENSG00000147168	IL2RG	-5.84211	0.000291188
ENSG00000140807	NKD1	-4.6791	0.000291236
ENSG00000168899	VAMP5	-4.09054	0.000291478
ENSG00000110446	SLC15A3	-4.37056	0.000292293
ENSG00000173372	C1QA	-14.0824	0.000292829
ENSG00000141338	ABCA8	-4.98608	0.00029355
ENSG00000168389	MFSD2A	3.12855	0.000294908
ENSG00000166573	GALR1	-8.67809	0.000297363
ENSG00000182013	PNMAL1	-3.16126	0.000297884
ENSG00000196932	TMEM26	-7.19457	0.000298867
ENSG00000131747	TOP2A	2.85383	0.000302134
ENSG00000169679	BUB1	3.64076	0.000302134
ENSG00000122861	PLAU	3.87605	0.000305164
ENSG00000185652	NTF3	-5.19963	0.000308362
ENSG00000185818	NAT8L	-6.8272	0.000308903
ENSG00000185668	POU3F1	3.62827	0.000323865
ENSG00000159433	STARD9	-4.31193	0.000324865
ENSG00000250208	FZD10-AS1	-4.74163	0.000325994
ENSG00000117013	KCNQ4	-6.48434	0.000328745
ENSG00000170396	ZNF804A	-5.51846	0.000328745
ENSG00000261116	RP3-523K23.2	3.18057	0.000329456
ENSG00000186198	SLC51B	-8.12089	0.000330359
ENSG00000182667	NTM	-6.29671	0.000330474
ENSG00000136244	IL6	-5.48816	0.000332508
ENSG00000163297	ANTXR2	-2.66003	0.000332703
ENSG00000272168	CASC15	-4.17163	0.000333827
ENSG00000083720	OXCT1	-2.69499	0.000335685
ENSG00000160801	PTH1R	-7.55368	0.000337561
ENSG00000113161	HMGCR	2.88388	0.000339574
ENSG00000144619	CNTN4	-5.1425	0.00034152
ENSG00000184709	LRRC26	-7.03899	0.000342542
ENSG00000177374	HIC1	-3.96444	0.00034633
ENSG00000128253	RFPL2	-8.00106	0.000351392
ENSG00000231679	HLA-DRB3	-7.84278	0.000356018
ENSG00000066279	ASPM	3.99801	0.000358708
ENSG00000153179	RASSF3	-2.71629	0.000358708
ENSG00000175489	LRRC25	-7.49795	0.000359177
ENSG00000196358	NTNG2	-6.01203	0.000368413
ENSG00000160808	MYL3	-8.74991	0.000368647
ENSG00000198142	SOWAHC	2.55034	0.000369129
ENSG00000151322	NPAS3	-5.49723	0.000373158
ENSG00000269186	LINC01082	-8.56325	0.000374203
ENSG00000152689	RASGRP3	-5.04813	0.000376155
ENSG00000186417	GLDN	-4.18022	0.000378452
ENSG00000167315	ACAA2	-3.45053	0.000379484
ENSG00000100450	GZMH	-8.3494	0.000380965
ENSG00000154229	PRKCA	-3.00214	0.000380965
ENSG00000139289	PHLDA1	2.72382	0.000400804
ENSG00000141582	CBX4	2.85223	0.000400977
ENSG00000150048	CLEC1A	-4.66924	0.000404659
ENSG00000220785	MTMR9LP	-2.99677	0.000406116
ENSG00000172116	CD8B	-7.9935	0.000406417
ENSG00000267121	CTD-2020K17.1	-6.66438	0.000407366
ENSG00000162711	NLRP3	-8.14806	0.000408663
ENSG00000181631	P2RY13	-7.956	0.000409229
ENSG00000095794	CREM	-3.2292	0.000415986
ENSG00000162739	SLAMF6	-8.35767	0.000416275
ENSG00000263934	SNORD3A	-3.7312	0.00041975
ENSG00000276173	IGHA2	-8.75329	0.00041975
ENSG00000164440	TXLNB	-7.56617	0.000425343
ENSG00000085265	FCN1	-7.94501	0.000426967
ENSG00000142512	SIGLEC10	-5.57008	0.000426967
ENSG00000167851	CD300A	-7.24573	0.000429214
ENSG00000164591	MYOZ3	-5.14911	0.000429494
ENSG00000164741	DLC1	-4.3596	0.000431685
ENSG00000140022	STON2	2.69063	0.000432368
ENSG00000132386	SERPINF1	-4.32793	0.000433472
ENSG00000158528	PPP1R9A	-4.06282	0.000434942
ENSG00000146192	FGD2	-4.92106	0.00043519
ENSG00000051341	POLQ	3.93377	0.000436303
ENSG00000158887	MPZ	-3.60683	0.000444
ENSG00000119711	ALDH6A1	-2.7696	0.000445802
ENSG00000105246	EBI3	-8.05185	0.000448214
ENSG00000158481	CD1C	-7.94199	0.000455041
ENSG00000163644	PPM1K	-4.00181	0.000457879
ENSG00000134762	DSC3	4.86862	0.00046139
ENSG00000145545	SRD5A1	2.64455	0.00046511
ENSG00000165424	ZCCHC24	-2.58586	0.000469778
ENSG00000273771	RP11-236L14.2	-5.28517	0.000474714
ENSG00000065413	ANKRD44	-4.07693	0.000477562
ENSG00000223382	RP1-65J11.1	-8.15706	0.000486211
ENSG00000160460	SPTBN4	-4.22603	0.000487205
ENSG00000155918	RAET1L	6.07138	0.000494511
ENSG00000168421	RHOH	-7.25525	0.000495695
ENSG00000281103	TRG-AS1	-7.94012	0.00049684
ENSG00000001626	CFTR	-5.20652	0.000502509
ENSG00000165996	HACD1	-3.16476	0.000502509
ENSG00000077009	NMRK2	-8.2995	0.00050522
ENSG00000186470	BTN3A2	-2.63656	0.000507413
ENSG00000245648	RP11-277P12.20	3.69431	0.000510961
ENSG00000213203	GIMAP1	-7.07923	0.000512181
ENSG00000149380	P4HA3	-5.45389	0.000512957
ENSG00000197506	SLC28A3	4.42133	0.000516726
ENSG00000128849	CGNL1	-2.61189	0.000516892
ENSG00000145861	C1QTNF2	-7.35348	0.000518435
ENSG00000170873	MTSS1	2.57908	0.00051871
ENSG00000248309	MEF2C-AS1	-8.12877	0.000520793
ENSG00000007062	PROM1	-5.42473	0.000521563
ENSG00000277633	IGHG1	-8.25639	0.000528729
ENSG00000167286	CD3D	-7.44788	0.000531053
ENSG00000255642	PABPC1P4	-3.92651	0.000532963
ENSG00000091972	CD200	-4.04949	0.000535798
ENSG00000117154	IGSF21	-8.07078	0.000537079
ENSG00000035499	DEPDC1B	4.31664	0.000539492
ENSG00000197859	ADAMTSL2	-8.20389	0.000540136
ENSG00000151632	AKR1C2	3.37834	0.000546791
ENSG00000127824	TUBA4A	2.76746	0.000548393
ENSG00000141750	STAC2	-8.01845	0.000548534
ENSG00000100307	CBX7	-2.71452	0.000552923
ENSG00000213606	AKR1B10P1	7.76006	0.000559215
ENSG00000026508	CD44	2.59304	0.00056108
ENSG00000152672	CLEC4F	-7.93063	0.00056108
ENSG00000165028	NIPSNAP3B	-3.59584	0.000562026
ENSG00000172247	C1QTNF4	-6.00395	0.000565278
ENSG00000100351	GRAP2	-7.97568	0.000566156
ENSG00000166592	RRAD	-4.60523	0.000572891
ENSG00000234336	JAZF1-AS1	-8.04078	0.000580787
ENSG00000108830	RND2	-3.52512	0.000587357
ENSG00000140368	PSTPIP1	-5.34508	0.000588116
ENSG00000184845	DRD1	-7.52085	0.000588116
ENSG00000179477	ALOX12B	6.96845	0.000589139
ENSG00000197702	PARVA	-2.432	0.000589964
ENSG00000077782	FGFR1	-2.60935	0.000594818
ENSG00000103034	NDRG4	3.33485	0.000595096
ENSG00000127074	RGS13	-8.09011	0.000597215
ENSG00000169436	COL22A1	-4.77419	0.000599366
ENSG00000130844	ZNF331	-2.56706	0.00060064
ENSG00000198932	GPRASP1	-3.03465	0.000603108
ENSG00000214274	ANG	-3.96074	0.000606379
ENSG00000183729	NPBWR1	5.51857	0.000607503
ENSG00000081277	PKP1	4.67952	0.000608664
ENSG00000161649	CD300LG	-7.90573	0.000613844
ENSG00000155011	DKK2	-7.9162	0.00062329
ENSG00000105383	CD33	-8.01016	0.000628263
ENSG00000126860	EVI2A	-7.2389	0.000629216
ENSG00000196196	HRCT1	-7.36152	0.000630966
ENSG00000072694	FCGR2B	-7.6489	0.00063224
ENSG00000112425	EPM2A	-3.22304	0.00063224
ENSG00000143194	MAEL	-7.28669	0.000633466
ENSG00000168993	CPLX1	-6.99751	0.000636276
ENSG00000167723	TRPV3	3.80574	0.0006377
ENSG00000188820	FAM26F	-4.96357	0.000638055
ENSG00000232855	AF131217.1	-4.23453	0.000638055
ENSG00000144891	AGTR1	-7.01063	0.000641829
ENSG00000169994	MYO7B	-8.08039	0.000641829
ENSG00000168734	PKIG	-3.63994	0.000646737
ENSG00000088992	TESC	-4.752	0.000647466
ENSG00000114013	CD86	-5.16533	0.000647466
ENSG00000112303	VNN2	-5.25272	0.000653201
ENSG00000159761	C16orf86	-4.09034	0.000653704
ENSG00000185745	IFIT1	-3.14072	0.000661893
ENSG00000112182	BACH2	-5.19278	0.000667009
ENSG00000172995	ARPP21	-8.36655	0.000669742
ENSG00000060558	GNA15	3.09352	0.000674479
ENSG00000157554	ERG	-3.05242	0.000674479
ENSG00000174332	GLIS1	-7.45258	0.000675421
ENSG00000177675	CD163L1	-8.10939	0.000676269
ENSG00000181778	TMEM252	-7.82286	0.000677245
ENSG00000126233	SLURP1	7.81934	0.000678123
ENSG00000138395	CDK15	-8.07031	0.000678123
ENSG00000156869	FRRS1	4.04711	0.000678123
ENSG00000183662	FAM19A1	-7.837	0.000678123
ENSG00000234964	FABP5P7	4.72825	0.000678123
ENSG00000141293	SKAP1	-7.09065	0.000682071
ENSG00000187800	PEAR1	-3.86802	0.000682071
ENSG00000071967	CYBRD1	-2.76719	0.000682779
ENSG00000156076	WIF1	-5.76654	0.000683541
ENSG00000078098	FAP	-5.16416	0.000684793
ENSG00000245105	A2M-AS1	-4.76314	0.000685686
ENSG00000137273	FOXF2	-3.73157	0.000685803
ENSG00000132872	SYT4	-8.01465	0.000686202
ENSG00000065328	MCM10	4.6578	0.000687741
ENSG00000134363	FST	-4.30427	0.000688721
ENSG00000165338	HECTD2	-3.49124	0.000690341
ENSG00000149021	SCGB1A1	4.33695	0.000693447
ENSG00000160469	BRSK1	-3.51664	0.000693707
ENSG00000164619	BMPER	-5.19693	0.000693707
ENSG00000204442	FAM155A	-6.98222	0.000699398
ENSG00000248668	OXCT1-AS1	-8.342	0.000700588
ENSG00000109063	MYH3	-4.42472	0.000700854
ENSG00000086696	HSD17B2	5.13643	0.000701641
ENSG00000108622	ICAM2	-4.29656	0.000701641
ENSG00000005884	ITGA3	3.36781	0.000702206
ENSG00000130222	GADD45G	-2.98201	0.000702206
ENSG00000182199	SHMT2	2.42477	0.00070378
ENSG00000146674	IGFBP3	-2.66452	0.00070393
ENSG00000156427	FGF18	-5.88037	0.000704445
ENSG00000163218	PGLYRP4	5.69192	0.000706083
ENSG00000112984	KIF20A	3.68928	0.000707806
ENSG00000050030	KIAA2022	-5.33396	0.000710946
ENSG00000169604	ANTXR1	-2.42325	0.000717434
ENSG00000280726	PCAT19	-8.04025	0.000723717
ENSG00000135476	ESPL1	3.23752	0.00073873
ENSG00000116741	RGS2	-3.80275	0.000741577
ENSG00000138271	GPR87	3.30313	0.000750016
ENSG00000120756	PLS1	3.87721	0.000751048
ENSG00000162415	ZSWIM5	-4.58519	0.000753442
ENSG00000115232	ITGA4	-4.73571	0.000755413
ENSG00000163082	SGPP2	4.62977	0.000756999
ENSG00000281852	LINC00891	-7.78401	0.000765896
ENSG00000010671	BTK	-5.0513	0.000769045
ENSG00000265542	RP11-60A24.3	-8.05025	0.000774417
ENSG00000244306	LINC01296	-6.13137	0.000777908
ENSG00000272789	RP11-286H15.1	-7.83712	0.000790574
ENSG00000198502	HLA-DRB5	-6.12961	0.000791666
ENSG00000108878	CACNG1	-8.64106	0.000793914
ENSG00000079308	TNS1	-3.70068	0.000795121
ENSG00000225255	LA16c-83F12.6	-8.16694	0.000795656
ENSG00000211897	IGHG3	-7.91428	0.000796311
ENSG00000163873	GRIK3	-7.48244	0.00080153
ENSG00000087076	HSD17B14	-4.38767	0.000802337
ENSG00000168143	FAM83B	3.82972	0.000802337
ENSG00000225217	HSPA7	-6.3973	0.00080412
ENSG00000245869	RP11-158I9.5	-7.77042	0.000817726
ENSG00000074181	NOTCH3	3.61539	0.000820016
ENSG00000100739	BDKRB1	4.54709	0.000823746
ENSG00000100968	NFATC4	-2.47799	0.000825388
ENSG00000109182	CWH43	4.49578	0.000827066
ENSG00000170537	TMC7	2.86033	0.000842491
ENSG00000154856	APCDD1	-2.61929	0.000842852
ENSG00000112276	BVES	-2.82257	0.000844584
ENSG00000095370	SH2D3C	-3.37123	0.000847146
ENSG00000093009	CDC45	3.55231	0.00085246
ENSG00000235162	C12orf75	-3.49678	0.00085246
ENSG00000101333	PLCB4	-2.95708	0.000855276
ENSG00000066294	CD84	-7.84735	0.000869402
ENSG00000164197	RNF180	-3.26244	0.000869402
ENSG00000272501	XXbac-BPG299F13.17	-4.68263	0.000874382
ENSG00000215853	RPTN	8.00005	0.000883472
ENSG00000184574	LPAR5	3.13923	0.000889214
ENSG00000101440	ASIP	-8.30044	0.000893526
ENSG00000134460	IL2RA	-8.30044	0.000893526
ENSG00000147251	DOCK11	-3.83493	0.000899872
ENSG00000249992	TMEM158	-3.04291	0.000902292
ENSG00000111799	COL12A1	-3.55591	0.000920698
ENSG00000178033	FAM26E	-7.47878	0.000920698
ENSG00000196329	GIMAP5	-7.7556	0.000922613
ENSG00000173068	BNC2	-3.47224	0.000930529
ENSG00000161405	IKZF3	-5.56797	0.000933187
ENSG00000203808	BVES-AS1	-7.74411	0.000933458
ENSG00000164303	ENPP6	-4.68476	0.000936083
ENSG00000037280	FLT4	-4.61197	0.000945044
ENSG00000042980	ADAM28	-4.09674	0.000951492
ENSG00000180447	GAS1	-3.61764	0.000951492
ENSG00000175445	LPL	-6.94306	0.000955451
ENSG00000086730	LAT2	-3.35483	0.000959054
ENSG00000135540	NHSL1	3.05307	0.000959054
ENSG00000092964	DPYSL2	-2.83724	0.000964826
ENSG00000153802	TMPRSS11D	5.4036	0.000975906
ENSG00000230798	FOXD3-AS1	-7.73138	0.000984284
ENSG00000173801	JUP	3.81655	0.000984523
ENSG00000273733	CTC-510F12.7	-6.32435	0.000988398
ENSG00000206579	XKR4	-8.0706	0.00100363
ENSG00000134755	DSC2	4.80252	0.00100435
ENSG00000172638	EFEMP2	-2.44097	0.001009
ENSG00000006071	ABCC8	-7.8546	0.00102438
ENSG00000110675	ELMOD1	-7.708	0.00102522
ENSG00000185532	PRKG1	-4.72415	0.00102522
ENSG00000117069	ST6GALNAC5	-7.1867	0.00103224
ENSG00000130528	HRC	-7.1867	0.00103224
ENSG00000265142	MIR133A1HG	-8.06956	0.00104228
ENSG00000108960	MMD	-3.50909	0.00104455
ENSG00000165511	C10orf25	-4.73122	0.00104886
ENSG00000136040	PLXNC1	-3.68325	0.00105252
ENSG00000163380	LMOD3	-6.92668	0.00105342
ENSG00000111186	WNT5B	-3.36416	0.00105343
ENSG00000179820	MYADM	-3.04435	0.00105538
ENSG00000267060	PTGES3L	-5.01827	0.00106587
ENSG00000027869	SH2D2A	-4.49001	0.00106707
ENSG00000001561	ENPP4	-3.41465	0.00108204
ENSG00000140459	CYP11A1	-6.91786	0.00108204
ENSG00000225670	CADM3-AS1	-7.87995	0.00108376
ENSG00000145708	CRHBP	-7.7432	0.00108991
ENSG00000111728	ST8SIA1	-4.42813	0.00110221
ENSG00000144045	DQX1	4.56567	0.00110316
ENSG00000167900	TK1	2.91857	0.00111424
ENSG00000076706	MCAM	-2.31699	0.00112604
ENSG00000271474	RP11-710C12.1	-5.96578	0.00113417
ENSG00000276231	PIK3R6	-7.68175	0.00113489
ENSG00000183196	CHST6	3.73732	0.00113898
ENSG00000120885	CLU	-2.46746	0.00114461
ENSG00000188624	IGFL3	7.85022	0.00114461
ENSG00000132530	XAF1	-3.19219	0.001145
ENSG00000231817	LINC01198	-7.891	0.00114628
ENSG00000258137	RP11-753H16.3	-7.7163	0.0011485
ENSG00000227136	LINC00595	-5.52569	0.00114855
ENSG00000104043	ATP8B4	-4.33717	0.001159
ENSG00000158714	SLAMF8	-5.65124	0.001159
ENSG00000165113	GKAP1	-2.94664	0.00116094
ENSG00000215182	MUC5AC	4.61256	0.00116953
ENSG00000100365	NCF4	-5.09151	0.00117065
ENSG00000126091	ST3GAL3	-2.98557	0.00117401
ENSG00000155858	LSM11	-2.60835	0.00117679
ENSG00000126264	HCST	-8.4472	0.00118889
ENSG00000255986	MT1JP	-7.78746	0.00118889
ENSG00000073756	PTGS2	-3.23501	0.0011892
ENSG00000114638	UPK1B	7.0835	0.00119974
ENSG00000187601	MAGEH1	-2.73166	0.00119974
ENSG00000167895	TMC8	-4.00137	0.00120818
ENSG00000170312	CDK1	3.11229	0.0012121
ENSG00000228798	AP000473.5	-6.03129	0.00121436
ENSG00000163293	NIPAL1	4.06821	0.0012232
ENSG00000280132	RP11-452L6.6	-7.7153	0.00122551
ENSG00000102383	ZDHHC15	-4.52721	0.00122732
ENSG00000106038	EVX1	-8.25602	0.00123767
ENSG00000100504	PYGL	2.42658	0.0012563
ENSG00000167741	GGT6	3.04925	0.0012563
ENSG00000137745	MMP13	4.00048	0.00125836
ENSG00000184005	ST6GALNAC3	-6.04847	0.00126356
ENSG00000187608	ISG15	-3.13048	0.00127994
ENSG00000131386	GALNT15	-6.20227	0.00128071
ENSG00000135298	ADGRB3	-7.80781	0.00128125
ENSG00000164128	NPY1R	-4.58653	0.00128143
ENSG00000183840	GPR39	4.40851	0.00129491
ENSG00000249751	ECSCR	-7.06981	0.00129491
ENSG00000162783	IER5	2.51637	0.00130088
ENSG00000153404	PLEKHG4B	-5.13703	0.00131997
ENSG00000228203	RNF144A-AS1	-7.78688	0.00132126
ENSG00000169946	ZFPM2	-5.80064	0.00132297
ENSG00000223561	AC003090.1	-6.12347	0.00132313
ENSG00000163762	TM4SF18	-4.26348	0.00132331
ENSG00000163827	LRRC2	-8.33513	0.00132892
ENSG00000138172	CALHM2	-2.79216	0.0013467
ENSG00000050767	COL23A1	-4.10039	0.00134692
ENSG00000114698	PLSCR4	-2.70701	0.00134835
ENSG00000165121	RP11-213G2.3	-3.01509	0.00135335
ENSG00000165480	SKA3	4.26035	0.00135636
ENSG00000109846	CRYAB	-3.71752	0.0013631
ENSG00000102879	CORO1A	-3.35704	0.00137021
ENSG00000172465	TCEAL1	-3.44817	0.00137116
ENSG00000168004	HRASLS5	-6.84659	0.00138184
ENSG00000227418	PCGEM1	-8.17673	0.00138375
ENSG00000196923	PDLIM7	-2.36679	0.00138402
ENSG00000136108	CKAP2	2.47198	0.00138464
ENSG00000137812	CASC5	3.24897	0.00139229
ENSG00000163531	NFASC	-2.85282	0.00139556
ENSG00000182866	LCK	-4.98092	0.00139556
ENSG00000167261	DPEP2	-8.31002	0.00139857
ENSG00000205277	MUC12	-6.73289	0.00140668
ENSG00000169403	PTAFR	3.39739	0.00140901
ENSG00000146555	SDK1	-3.44311	0.00141822
ENSG00000146477	SLC22A3	-2.67682	0.00143002
ENSG00000261616	RP11-6O2.3	-4.92314	0.00143042
ENSG00000100490	CDKL1	-3.95849	0.00143609
ENSG00000161249	DMKN	3.07707	0.0014407
ENSG00000092295	TGM1	4.34209	0.00144188
ENSG00000080709	KCNN2	-5.77759	0.00144273
ENSG00000120903	CHRNA2	-7.99333	0.00144424
ENSG00000143590	EFNA3	3.00823	0.00148036
ENSG00000184304	PRKD1	-2.92957	0.00148144
ENSG00000140030	GPR65	-7.7257	0.00149675
ENSG00000184661	CDCA2	3.75167	0.00150745
ENSG00000157782	CABP1	-5.69507	0.00151134
ENSG00000119314	PTBP3	2.3145	0.00152874
ENSG00000105011	ASF1B	3.14101	0.00152932
ENSG00000165650	PDZD8	2.30437	0.00153213
ENSG00000160213	CSTB	2.3989	0.0015336
ENSG00000232126	HLA-B	-2.79106	0.0015336
ENSG00000181619	GPR135	-3.42559	0.00154593
ENSG00000148541	FAM13C	-3.88555	0.0015497
ENSG00000124343	XG	3.33844	0.00155097
ENSG00000167434	CA4	-7.73379	0.00155308
ENSG00000114854	TNNC1	-9.81006	0.0015541
ENSG00000131401	NAPSB	-4.42776	0.00155528
ENSG00000096696	DSP	4.68123	0.00155667
ENSG00000128917	DLL4	-3.35888	0.00155667
ENSG00000211598	IGKV4-1	-7.63946	0.00156027
ENSG00000261269	RP11-389C8.2	-6.74333	0.00158072
ENSG00000017483	SLC38A5	-3.67151	0.00158203
ENSG00000160791	CCR5	-7.58726	0.00158222
ENSG00000236609	ZNF853	-2.67928	0.0015899
ENSG00000269293	ZSCAN16-AS1	-4.13813	0.00159266
ENSG00000177133	LINC00982	-7.94561	0.00159828
ENSG00000019485	PRDM11	-3.0289	0.00159898
ENSG00000198576	ARC	4.03565	0.00161496
ENSG00000156463	SH3RF2	3.20845	0.00162473
ENSG00000088325	TPX2	3.19871	0.00162495
ENSG00000139318	DUSP6	3.13159	0.00163121
ENSG00000004399	PLXND1	-2.68745	0.00163174
ENSG00000105967	TFEC	-7.87944	0.00165219
ENSG00000282608	ADORA3	-7.92417	0.0016803
ENSG00000186212	SOWAHB	4.64335	0.00168128
ENSG00000233117	LINC00702	-5.90898	0.00169078
ENSG00000162896	PIGR	-5.60197	0.00170114
ENSG00000131097	HIGD1B	-6.69932	0.00170235
ENSG00000168824	D4S234E	2.93082	0.00170235
ENSG00000050165	DKK3	-2.25126	0.00171194
ENSG00000167371	PRRT2	-4.16675	0.00171565
ENSG00000267414	RP11-456K23.1	-4.60797	0.00171565
ENSG00000197142	ACSL5	-3.06163	0.00172378
ENSG00000164125	FAM198B	-2.77879	0.00175657
ENSG00000120833	SOCS2	-2.44032	0.00177862
ENSG00000196503	ARL9	-7.54707	0.00177862
ENSG00000154589	LY96	-4.84815	0.00177947
ENSG00000112394	SLC16A10	-3.98912	0.00178285
ENSG00000152402	GUCY1A2	-4.08957	0.00178411
ENSG00000171246	NPTX1	-7.8761	0.00179048
ENSG00000100599	RIN3	-2.64653	0.00181906
ENSG00000164070	HSPA4L	2.54114	0.00182182
ENSG00000196381	ZNF781	-7.56861	0.0018239
ENSG00000198851	CD3E	-3.73854	0.00182795
ENSG00000162409	PRKAA2	-2.89654	0.00182879
ENSG00000223532	HLA-B	-2.96651	0.00182993
ENSG00000188803	SHISA6	-5.39395	0.00183012
ENSG00000198879	SFMBT2	-2.7794	0.00183285
ENSG00000149781	FERMT3	-3.54331	0.00184854
ENSG00000064989	CALCRL	-2.89333	0.00188292
ENSG00000146670	CDCA5	3.10557	0.00188775
ENSG00000065357	DGKA	2.71683	0.00189096
ENSG00000164543	STK17A	2.42214	0.00189839
ENSG00000176907	C8orf4	-2.49326	0.00190173
ENSG00000214814	FER1L6	7.91259	0.00190825
ENSG00000117650	NEK2	3.75446	0.00191196
ENSG00000152092	ASTN1	-6.84911	0.00192068
ENSG00000198915	RASGEF1A	-5.94893	0.00193926
ENSG00000134202	GSTM3	-2.69442	0.00194905
ENSG00000100427	MLC1	-7.63496	0.00195409
ENSG00000158825	CDA	3.35259	0.00195619
ENSG00000105643	ARRDC2	-2.39315	0.00195962
ENSG00000226124	FTCDNL1	-5.54917	0.0019653
ENSG00000188910	GJB3	3.96311	0.00196532
ENSG00000102683	SGCG	-5.57193	0.0019659
ENSG00000120645	IQSEC3	-7.64225	0.00197203
ENSG00000260581	CTB-113P19.4	6.42417	0.0019847
ENSG00000116990	MYCL	2.4426	0.00198839
ENSG00000140937	CDH11	-2.81696	0.00200887
ENSG00000271601	LIX1L	-3.04286	0.00202113
ENSG00000166091	CMTM5	-6.70253	0.00203609
ENSG00000198821	CD247	-6.71871	0.00203714
ENSG00000145244	CORIN	-3.90608	0.00204009
ENSG00000277494	GPIHBP1	-7.00186	0.00204009
ENSG00000135378	PRRG4	3.01936	0.00204661
ENSG00000182218	HHIPL1	-4.32118	0.0020572
ENSG00000182472	CAPN12	3.2767	0.00205986
ENSG00000196517	SLC6A9	3.31614	0.00206239
ENSG00000150681	RGS18	-7.52815	0.00206361
ENSG00000168546	GFRA2	-7.54104	0.00207588
ENSG00000162894	FCMR	-3.89237	0.00208144
ENSG00000151778	SERP2	-3.16559	0.0021016
ENSG00000153563	CD8A	-4.52586	0.00210293
ENSG00000267100	ILF3-AS1	-2.50998	0.00213966
ENSG00000101000	PROCR	-2.64874	0.00214013
ENSG00000155926	SLA	-11.3067	0.00214568
ENSG00000177301	KCNA2	-7.60113	0.00220707
ENSG00000206450	HLA-B	-3.05231	0.00221492
ENSG00000224367	OACYLP	-6.56502	0.00221821
ENSG00000260947	RP11-384P7.7	-7.49977	0.00222573
ENSG00000169218	RSPO1	-6.69222	0.00223135
ENSG00000197977	ELOVL2	-6.80705	0.00224201
ENSG00000152969	JAKMIP1	-7.73504	0.00225253
ENSG00000218227	RP11-889L3.1	-3.21143	0.00225356
ENSG00000003249	DBNDD1	3.16853	0.00225532
ENSG00000112414	ADGRG6	2.67946	0.00229562
ENSG00000147676	MAL2	3.85615	0.00230968
ENSG00000100311	PDGFB	-3.03841	0.00232211
ENSG00000086570	FAT2	5.00945	0.00233107
ENSG00000101342	TLDC2	-7.51204	0.00233501
ENSG00000228594	C1orf233	4.24902	0.0023469
ENSG00000072310	SREBF1	2.88982	0.00234918
ENSG00000134909	ARHGAP32	3.33816	0.0023537
ENSG00000112186	CAP2	-2.63287	0.00236518
ENSG00000275880	RP11-90L1.8	5.10252	0.00237034
ENSG00000196507	TCEAL3	-2.80013	0.00237265
ENSG00000173281	PPP1R3B	-2.36357	0.0023858
ENSG00000174944	P2RY14	-7.8569	0.00239275
ENSG00000214578	HMGN2P15	-7.8569	0.00239275
ENSG00000115138	POMC	-5.30577	0.00239373
ENSG00000141744	PNMT	-7.30982	0.0024026
ENSG00000074047	GLI2	-4.56611	0.00240597
ENSG00000269113	TRABD2B	-4.7404	0.00245435
ENSG00000182310	SPACA6P	-2.69852	0.00245629
ENSG00000196368	NUDT11	-2.72607	0.00245629
ENSG00000117245	KIF17	-6.682	0.00246473
ENSG00000106511	MEOX2	-7.49709	0.00248604
ENSG00000135077	HAVCR2	-4.4039	0.00248604
ENSG00000137558	PI15	-2.72036	0.00250858
ENSG00000160471	COX6B2	4.23431	0.00250858
ENSG00000188916	FAM196A	-5.73256	0.00252139
ENSG00000107551	RASSF4	-3.0966	0.00252278
ENSG00000104738	MCM4	2.39793	0.00252975
ENSG00000143110	C1orf162	-3.76548	0.00253944
ENSG00000174576	NPAS4	-6.54786	0.00253944
ENSG00000063660	GPC1	2.89204	0.0025505
ENSG00000079112	CDH17	-7.51408	0.00256163
ENSG00000165025	SYK	2.26825	0.00256163
ENSG00000162882	HAAO	-2.97107	0.002576
ENSG00000019169	MARCO	-8.30313	0.00258019
ENSG00000143476	DTL	3.19595	0.00258019
ENSG00000124701	APOBEC2	-6.31501	0.00261142
ENSG00000179674	ARL14	6.40182	0.00261911
ENSG00000113083	LOX	-3.80993	0.00262067
ENSG00000162267	ITIH3	-6.68178	0.00262067
ENSG00000253520	RP11-798K23.5	-6.68178	0.00262067
ENSG00000108387	2020-09-04	-3.4464	0.00263324
ENSG00000164611	PTTG1	2.80443	0.00264519
ENSG00000142627	EPHA2	3.36284	0.00264772
ENSG00000102471	NDFIP2	2.30453	0.00272835
ENSG00000182287	AP1S2	-2.87227	0.00276212
ENSG00000176597	B3GNT5	2.29834	0.00280081
ENSG00000155970	MICU3	-3.33215	0.00280462
ENSG00000134072	CAMK1	-3.20397	0.00280899
ENSG00000130045	NXNL2	-5.03366	0.00282739
ENSG00000163823	CCR1	-6.54902	0.00282739
ENSG00000249242	TMEM150C	-3.23748	0.00282739
ENSG00000113621	TXNDC15	-2.46407	0.00284461
ENSG00000166183	ASPG	6.65462	0.00285041
ENSG00000253379	RP11-1102P16.1	-7.4808	0.00286752
ENSG00000134326	CMPK2	-3.76551	0.00288779
ENSG00000146242	TPBG	2.37368	0.00292819
ENSG00000173546	CSPG4	-3.43642	0.00296906
ENSG00000198805	PNP	2.45862	0.0029879
ENSG00000254027	RP11-363E6.3	7.27085	0.00299228
ENSG00000280977	Z93930.1	-4.72965	0.00299899
ENSG00000041515	MYO16	-5.89269	0.00300727
ENSG00000109255	NMU	6.43032	0.00301093
ENSG00000179542	SLITRK4	-5.99227	0.00303151
ENSG00000135736	CCDC102A	-2.86448	0.00303378
ENSG00000170927	PKHD1	-7.20898	0.00304191
ENSG00000111863	ADTRP	4.41848	0.00304453
ENSG00000047648	ARHGAP6	-3.02974	0.00305533
ENSG00000108001	EBF3	-5.728	0.00306002
ENSG00000179855	GIPC3	-5.66005	0.00306002
ENSG00000268621	AC006262.5	5.45508	0.00307674
ENSG00000196136	SERPINA3	-4.55278	0.00308899
ENSG00000176049	JAKMIP2	-7.77402	0.00310847
ENSG00000114738	MAPKAPK3	2.28716	0.00311693
ENSG00000182132	KCNIP1	-7.60298	0.00311899
ENSG00000156265	MAP3K7CL	-3.56406	0.00312858
ENSG00000259969	RP11-999E24.3	-4.60596	0.00315079
ENSG00000129910	CDH15	-8.04246	0.00315584
ENSG00000169184	MN1	-3.71396	0.00316496
ENSG00000204851	PNMAL2	-6.52636	0.00316496
ENSG00000185761	ADAMTSL5	2.61652	0.00317409
ENSG00000104879	CKM	-12.2087	0.00317707
ENSG00000255090	MIR100HG	-7.56487	0.00317721
ENSG00000258314	CTD-2314B22.1	-7.65749	0.00318142
ENSG00000140015	KCNH5	-8.19749	0.00319656
ENSG00000170011	MYRIP	-6.51008	0.00324261
ENSG00000278309	RP11-102K13.5	-5.34923	0.00324261
ENSG00000139278	GLIPR1	-2.88392	0.00326647
ENSG00000105131	EPHX3	4.39043	0.00328424
ENSG00000165349	SLC7A3	-7.48625	0.00330028
ENSG00000124713	GNMT	-4.87972	0.00332511
ENSG00000171101	SIGLEC17P	-7.36428	0.00332675
ENSG00000104894	CD37	-3.4863	0.00333922
ENSG00000144230	GPR17	-7.57503	0.00333922
ENSG00000156103	MMP16	-4.87832	0.00334038
ENSG00000122870	BICC1	-3.40943	0.00335857
ENSG00000155093	PTPRN2	-2.35506	0.00336551
ENSG00000251661	RP11-326C3.11	-4.38367	0.00337358
ENSG00000184731	FAM110C	3.56506	0.00337706
ENSG00000162706	CADM3	-7.51682	0.00339591
ENSG00000165868	HSPA12A	-2.75876	0.00339997
ENSG00000109062	SLC9A3R1	2.78827	0.00340251
ENSG00000100344	PNPLA3	6.41026	0.00342152
ENSG00000182489	XKRX	4.68637	0.00342152
ENSG00000099960	SLC7A4	3.29634	0.00346265
ENSG00000167992	VWCE	-4.18392	0.00348644
ENSG00000010282	HHATL	-8.06308	0.00350396
ENSG00000186684	CYP27C1	2.80211	0.00350396
ENSG00000178947	SMIM10L2A	3.43737	0.00351875
ENSG00000026950	BTN3A1	-2.46073	0.00356568
ENSG00000113721	PDGFRB	-4.61139	0.00358842
ENSG00000232057	AC093390.1	-7.98018	0.00358955
ENSG00000197406	DIO3	-7.35459	0.00363022
ENSG00000112742	TTK	3.2079	0.00363499
ENSG00000147113	CXorf36	-4.07764	0.00363499
ENSG00000165124	SVEP1	-3.53214	0.00363499
ENSG00000165457	FOLR2	-11.5698	0.00365006
ENSG00000172794	RAB37	-3.60658	0.00365006
ENSG00000163032	VSNL1	3.47538	0.00366514
ENSG00000131094	C1QL1	-5.10183	0.00366614
ENSG00000144834	TAGLN3	5.01245	0.00370496
ENSG00000198682	PAPSS2	-2.64638	0.00371704
ENSG00000175591	P2RY2	3.38308	0.00372
ENSG00000228784	LINC00954	-7.33084	0.00373039
ENSG00000267454	ZNF582-AS1	-4.03697	0.00373728
ENSG00000069011	PITX1	2.88222	0.00374083
ENSG00000278376	RP11-158I9.8	-3.56442	0.00374083
ENSG00000169224	GCSAML	-6.49652	0.00374274
ENSG00000227954	TARID	-4.55557	0.00376848
ENSG00000070404	FSTL3	-3.06621	0.00378979
ENSG00000203778	FAM229B	-3.44055	0.00381674
ENSG00000145526	CDH18	-7.74728	0.00386017
ENSG00000086967	MYBPC2	-7.82033	0.00386298
ENSG00000160111	CPAMD8	-3.72713	0.00386807
ENSG00000117399	CDC20	3.0781	0.00396837
ENSG00000158473	CD1D	-5.42466	0.003992
ENSG00000188130	MAPK12	-3.16438	0.00401096
ENSG00000117228	GBP1	-2.41783	0.00402415
ENSG00000198542	ITGBL1	-7.44829	0.0040735
ENSG00000176454	LPCAT4	2.34879	0.00409916
ENSG00000277022	RP3-453C12.15	-7.40293	0.00409916
ENSG00000106546	AHR	2.23306	0.00412149
ENSG00000112210	RAB23	-2.36982	0.00413193
ENSG00000211896	IGHG1	-11.2162	0.00417011
ENSG00000281406	BLACAT1	4.42005	0.0041887
ENSG00000128815	WDFY4	-7.39286	0.00423239
ENSG00000215217	C5orf49	-4.37352	0.00423529
ENSG00000101977	MCF2	-4.38957	0.00424246
ENSG00000109667	SLC2A9	2.47771	0.00424246
ENSG00000166106	ADAMTS15	2.67046	0.00424593
ENSG00000174371	EXO1	3.66592	0.00425431
ENSG00000158555	GDPD5	-3.66639	0.00425433
ENSG00000102010	BMX	-5.05531	0.00425618
ENSG00000229056	AC020571.3	-5.28619	0.00425618
ENSG00000111206	FOXM1	2.88494	0.00426255
ENSG00000108852	MPP2	-3.03033	0.00427318
ENSG00000130598	TNNI2	-11.5241	0.004293
ENSG00000163535	SGOL2	2.77471	0.00430721
ENSG00000186831	KRT17P2	3.88653	0.00433545
ENSG00000140534	TICRR	2.947	0.00434256
ENSG00000278709	NKILA	-5.42402	0.00435144
ENSG00000180644	PRF1	-7.32424	0.00436357
ENSG00000272405	RP11-284F21.10	3.67882	0.00438224
ENSG00000135218	CD36	-3.47145	0.00438392
ENSG00000135426	TESPA1	-6.40847	0.00442409
ENSG00000039537	C6	-7.50706	0.00444428
ENSG00000092841	MYL6	-3.03737	0.00444428
ENSG00000177990	DPY19L2	-3.89687	0.00444604
ENSG00000158315	RHBDL2	3.45518	0.0044602
ENSG00000176204	LRRTM4	-7.45738	0.00446322
ENSG00000130201	EXOC3L2	-5.68751	0.00447393
ENSG00000143632	ACTA1	-9.78571	0.00449074
ENSG00000099864	PALM	-2.43545	0.00449746
ENSG00000154102	C16orf74	2.65312	0.00451522
ENSG00000198515	CNGA1	3.09249	0.00452808
ENSG00000172733	PURG	-7.3398	0.00453428
ENSG00000198785	GRIN3A	-4.73069	0.00453539
ENSG00000006638	TBXA2R	-6.42487	0.00454932
ENSG00000154678	PDE1C	-4.4695	0.0045762
ENSG00000184343	SRPK3	-3.92137	0.0045762
ENSG00000260549	MT1L	-3.97334	0.0045762
ENSG00000279496	CTC-251I16.1	-5.62593	0.00458205
ENSG00000138741	TRPC3	-7.2634	0.00463542
ENSG00000177575	CD163	-11.5386	0.00467016
ENSG00000174307	PHLDA3	2.0756	0.00467556
ENSG00000278301	GRAMD4P3	-7.26903	0.00468041
ENSG00000141682	PMAIP1	2.93763	0.00473233
ENSG00000148219	ASTN2	-3.18865	0.00473923
ENSG00000146904	EPHA1	3.71311	0.00475227
ENSG00000198963	RORB	-3.54459	0.00476446
ENSG00000151376	ME3	-2.41735	0.00477075
ENSG00000157103	SLC6A1	-7.34376	0.00478493
ENSG00000163814	CDCP1	3.18622	0.00478493
ENSG00000128165	ADM2	4.33583	0.00478514
ENSG00000079150	FKBP7	-3.13713	0.00478637
ENSG00000170545	SMAGP	2.48871	0.00478637
ENSG00000224982	TMEM233	-7.5215	0.00478637
ENSG00000198947	DMD	-2.40831	0.00480364
ENSG00000260329	RP11-412D9.4	-3.73872	0.004807
ENSG00000206549	PRSS50	-7.27082	0.00480912
ENSG00000171509	RXFP1	-7.2494	0.00485364
ENSG00000187323	DCC	-6.38131	0.00485364
ENSG00000110079	MS4A4A	-10.9465	0.00489166
[truncated: 1,136 more rows]
